# Supplementary material for: Bargellini condensation of ninhydrin as a ketone and substituted anilines as nucleophiles
Source: Royal Society of Chemistry journal article supplement (doi:10.1039/c5nj03455h), 2016-01-01

## Bargellini condensation of ninhydrin as a ketone and substituted anilines as nucleophiles

Z. Rashid<sup>a</sup>, R. Ghahremanzadeh<sup>c</sup> and H. Naeimi<sup>b\*</sup>

<sup>a</sup>Department of Organic Chemistry, Faculty of Chemistry, University of Kashan, Kashan, 87317, I.R. Iran.

<sup>b</sup>Nanobiotechnology Research Center, Avicenna Research Institute, (ACECR), Tehran, Iran.

E-mail: Naeimi@kashanu.ac.ir

### SUPPORTING INFORMATION

| <i>List of contents</i>          | <i>Page</i> | <i>List of contents</i>          | <i>Page</i> |
|----------------------------------|-------------|----------------------------------|-------------|
| Title, author's name, address    | <b>1</b>    | <sup>13</sup> C NMR of <b>3g</b> | <b>21</b>   |
| characterization data            | <b>2-8</b>  | <sup>1</sup> H NMR of <b>3h</b>  | <b>22</b>   |
| <sup>1</sup> H NMR of <b>3a</b>  | <b>9</b>    | <sup>13</sup> C NMR of <b>3h</b> | <b>23</b>   |
| <sup>13</sup> C NMR of <b>3a</b> | <b>10</b>   | <sup>1</sup> H NMR of <b>3i</b>  | <b>24</b>   |
| <sup>1</sup> H NMR of <b>3b</b>  | <b>11</b>   | <sup>13</sup> C NMR of <b>3i</b> | <b>25</b>   |
| <sup>13</sup> C NMR of <b>3b</b> | <b>12</b>   | <sup>1</sup> H NMR of <b>3j</b>  | <b>26</b>   |
| <sup>1</sup> H NMR of <b>3c</b>  | <b>13</b>   | <sup>13</sup> C NMR of <b>3j</b> | <b>27</b>   |
| <sup>13</sup> C NMR of <b>3c</b> | <b>14</b>   | <sup>1</sup> H NMR of <b>3k</b>  | <b>28</b>   |
| <sup>1</sup> H NMR of <b>3d</b>  | <b>15</b>   | <sup>13</sup> C NMR of <b>3k</b> | <b>29</b>   |
| <sup>13</sup> C NMR of <b>3d</b> | <b>16</b>   | <sup>1</sup> H NMR of <b>3l</b>  | <b>30</b>   |
| <sup>1</sup> H NMR of <b>3e</b>  | <b>17</b>   | <sup>13</sup> C NMR of <b>3l</b> | <b>31</b>   |
| <sup>13</sup> C NMR of <b>3e</b> | <b>18</b>   | <sup>1</sup> H NMR of <b>3m</b>  | <b>32</b>   |
| <sup>1</sup> H NMR of <b>3f</b>  | <b>19</b>   | <sup>13</sup> C NMR of <b>3m</b> | <b>33</b>   |
| <sup>1</sup> H NMR of <b>3g</b>  | <b>20</b>   | <sup>1</sup> H NMR of <b>3n</b>  | <b>34</b>   |

**1,3-Dioxo-2-(phenylamino)-2,3-dihydro-1H-indene-2-carboxylic acid (3a)**

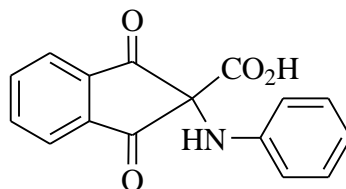

White powder (Yield: 87%). mp: 147 °C. IR (KBr) ( $\nu_{\max}$ /  $\text{cm}^{-1}$ ): 3338, 1796, 1775, 1670;  $^1\text{H}$  NMR (DMSO- $d_6$ , 400 MHz):  $\delta$ : 6.22 (1H, s, NH), 7.33-7.80 (9H, m, ArH), 10.64 (1H, s, OH);  $^{13}\text{C}$  NMR (DMSO- $d_6$ , 100 MHz):  $\delta$ : 79.1, 120.4, 123.1, 124.8, 124.9, 125.7, 129.3, 130.5, 135.3, 138.3, 146.2, 164.9, 170.2; Anal. Calcd for  $\text{C}_{16}\text{H}_{11}\text{NO}_4$ : C, 68.32; H, 3.94; N, 4.98; Found C, 68.35; H, 4.99; N, 4.95; MS:  $m/z$  281.07.

**1,3-Dioxo-2-(*p*-tolylamino)-2,3-dihydro-1H-indene-2-carboxylic acid (3b)**

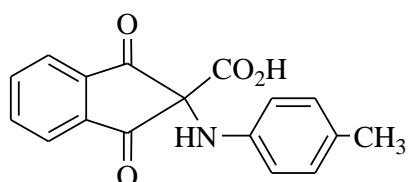

White powder (Yield: 89%). mp: 169 °C. IR (KBr) ( $\nu_{\max}$ /  $\text{cm}^{-1}$ ): 3343, 1769, 1669, 1599;  $^1\text{H}$  NMR (DMSO- $d_6$ , 400 MHz):  $\delta$ : 2.24 (3H, s,  $\text{CH}_3$ ), 6.19 (1H, s, NH), 7.11-7.92 (8H, m, ArH), 10.54 (1H, s, OH);  $^{13}\text{C}$  NMR (DMSO- $d_6$ , 100 MHz):  $\delta$ : 20.92, 79.21, 120.4, 123.1, 124.9, 125.6, 129.6, 130.5, 133.8, 135.3, 135.8, 146.3, 164.7, 170.1; Anal. Calcd for  $\text{C}_{17}\text{H}_{13}\text{NO}_4$ : C, 69.15; H, 4.44; N, 4.74; Found C, 69.18; H, 4.48; N, 4.70; MS:  $m/z$  295.08.

**1,3-Dioxo-2-(*o*-tolylamino)-2,3-dihydro-1*H*-indene-2-carboxylic acid (3c)**

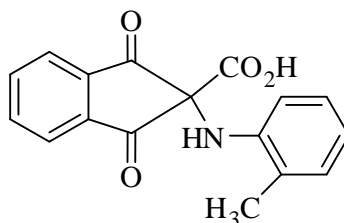

Cream powder (Yield: 81%). mp: 140 °C. IR (KBr) ( $\nu_{\max}$ /  $\text{cm}^{-1}$ ): 3349, 1769, 1690, 1531;  $^1\text{H}$  NMR (DMSO- $d_6$ , 400 MHz):  $\delta$ : 2.13 (3H, s, CH<sub>3</sub>), 6.28 (1H, s, NH), 7.14-7.93 (8H, m, ArH), 10.09 (1H, s, OH);  $^{13}\text{C}$  NMR (DMSO- $d_6$ , 100 MHz):  $\delta$ : 18.1, 78.0, 123.1, 123.4, 124.9, 125.7, 126.0, 126.6, 126.7, 130.5, 130.9, 133.1, 135.3, 135.5, 147.4, 165.2, 170.2 ; Anal. Calcd for C<sub>17</sub>H<sub>13</sub>NO<sub>4</sub>: C, 69.15; H, 4.44; N, 4.74; Found C, 69.11; H, 4.39; N, 4.77; MS:  $m/z$  295.08.

**2-(2,4-Dimethylphenylamino)-1,3-dioxo-2,3-dihydro-1*H*-indene-2-carboxylic acid (3d)**

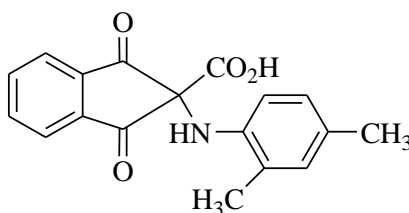

Cream powder (Yield: 83%). mp: 147 °C. IR (KBr) ( $\nu_{\max}$ /  $\text{cm}^{-1}$ ): 3343, 1796, 1669, 1599;  $^1\text{H}$  NMR (DMSO- $d_6$ , 400 MHz):  $\delta$ : 2.07 (3H, s, CH<sub>3</sub>), 2.17 (3H, s, CH<sub>3</sub>), 6.25 (1H, s, NH), 6.95-7.91 (7H, m, ArH), 9.99 (1H, s, OH);  $^{13}\text{C}$  NMR (DMSO- $d_6$ , 100 MHz):  $\delta$ : 18.0, 20.9, 79.1, 123.1, 124.9, 125.6, 126.0, 127.0, 130.4, 131.4, 132.9, 133.0, 135.2, 135.8, 146.5, 165.2, 170.2; Anal. Calcd for C<sub>18</sub>H<sub>15</sub>NO<sub>4</sub>: C, 69.89; H, 4.89; N, 4.53; Found C, 69.92; H, 4.85; N, 4.50; MS:  $m/z$  309.10.

**2-(4-Methoxyphenylamino)-1,3-dioxo-2,3-dihydro-1H-indene-2-carboxylic acid (3e)**

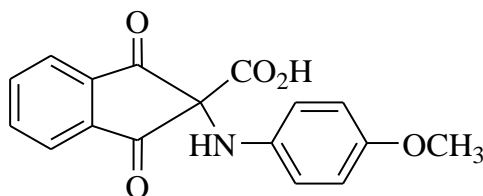

White powder (Yield: 91%). mp: 147 °C. IR (KBr) ( $\nu_{\text{max}}$ /  $\text{cm}^{-1}$ ): 3280, 1777, 1674, 1606;  $^1\text{H}$  NMR (DMSO- $d_6$ , 400 MHz):  $\delta$ : 3.71 (3H, s, OCH<sub>3</sub>), 6.18 (1H, s, NH), 6.88-7.92 (8H, m, ArH), 10.49 (1H, s, OH);  $^{13}\text{C}$  NMR (DMSO- $d_6$ , 100 MHz):  $\delta$ : 55.6, 79.1, 114.1, 114.3, 122.0, 123.1, 124.9, 125.6, 130.5, 131.4, 135.3, 146.4, 156.3, 164.5, 170.2; Anal. Calcd for C<sub>17</sub>H<sub>13</sub>NO<sub>5</sub>: C, 65.59; H, 4.21; N, 4.50; Found C, 65.62; H, 4.19; N, 4.47; MS:  $m/z$  311.08.

Due to very low solubility of the products **3f**, we cannot report the  $^{13}\text{C}$  NMR data for this product.

**2-(4-Bromophenylamino)-1,3-dioxo-2,3-dihydro-1H-indene-2-carboxylic acid (3f)**

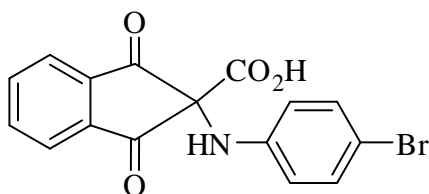

White powder (Yield: 84%). mp: 220 °C. IR (KBr) ( $\nu_{\text{max}}$ /  $\text{cm}^{-1}$ ): 3419, 1778, 1683, 1592;  $^1\text{H}$  NMR (DMSO- $d_6$ , 400 MHz):  $\delta$ : 6.23 (1H, s, NH), 7.51-7.94 (8H, m, ArH), 10.74 (1H, s, OH); Anal. Calcd for C<sub>16</sub>H<sub>10</sub>BrNO<sub>4</sub>: C, 53.36; H, 2.80; N, 3.89; Found C, 53.40; H, 2.85; N, 3.93; MS:  $m/z$  358.98, 360.18.

**2-(4-Chlorophenylamino)-1,3-dioxo-2,3-dihydro-1H-indene-2-carboxylic acid (3g)**

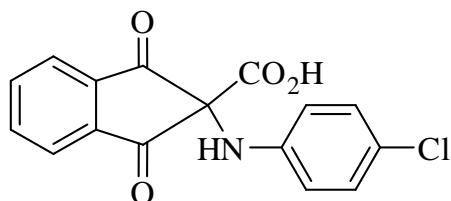

White powder (Yield: 80%). mp: 180 °C. IR (KBr) ( $\nu_{\max}/\text{cm}^{-1}$ ): 3347, 1770, 1690, 1597;  $^1\text{H}$  NMR (DMSO-*d*<sub>6</sub>, 400 MHz):  $\delta$ : 6.21 (1H, s, NH), 7.37-7.92 (8H, m, ArH), 10.75 (1H, s, OH);  $^{13}\text{C}$  NMR (DMSO-*d*<sub>6</sub>, 100 MHz):  $\delta$ : 84.0, 126.9, 128.0, 129.6, 130.5, 133.2, 134.0, 135.4, 140.1, 142.1, 150.9, 169.9, 174.9.; Anal. Calcd for C<sub>16</sub>H<sub>10</sub>ClNO<sub>4</sub>: C, 60.87; H, 3.19; N, 4.44; Found C, 60.91; H, 3.24; N, 4.49; MS:  $m/z$  315.03.

**2-(3-Chlorophenylamino)-1,3-dioxo-2,3-dihydro-1H-indene-2-carboxylic acid (3h)**

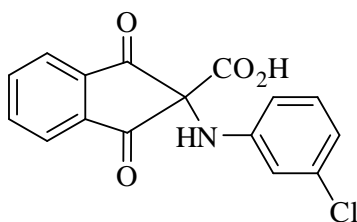

White powder (Yield: 76%). mp: 148 °C. IR (KBr) ( $\nu_{\max}/\text{cm}^{-1}$ ): 3437, 1684, 1596, 1538;  $^1\text{H}$  NMR (DMSO-*d*<sub>6</sub>, 400 MHz):  $\delta$ : 6.11 (1H, s, NH), 7.08-7.89 (8H, m, ArH), 10.17 (1H, s, OH);  $^{13}\text{C}$  NMR (DMSO-*d*<sub>6</sub>, 100 MHz):  $\delta$ : 70.7, 118.5, 119.5, 123.5, 127.8, 127.9, 130.1, 130.7, 131.1, 132.0, 133.4, 140.6, 141.7, 169.5, 171.7; Anal. Calcd for C<sub>16</sub>H<sub>10</sub>ClNO<sub>4</sub>: C, 60.87; H, 3.19; N, 4.44; Found C, 60.84; H, 3.15; N, 4.48; MS:  $m/z$  315.03.

**2-(2-Chlorophenylamino)-1,3-dioxo-2,3-dihydro-1H-indene-2-carboxylic acid (3i)**

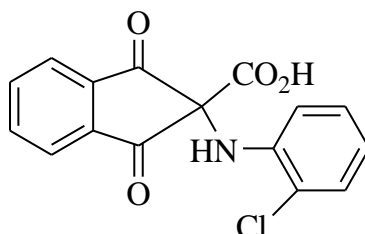

White powder (Yield: 72%). mp: 132 °C. IR (KBr) ( $\nu_{\max}/\text{cm}^{-1}$ ): 3385, 1786, 1685, 1596;  $^1\text{H}$  NMR (DMSO- $d_6$ , 400 MHz):  $\delta$ : 6.34 (1H, s, NH), 7.25-7.91 (8H, m, ArH), 10.33 (1H, s, OH);  $^{13}\text{C}$  NMR (DMSO- $d_6$ , 100 MHz):  $\delta$ : 78.9, 123.3, 124.8, 125.7, 127.4, 128.0, 128.0, 128.2, 130.1, 130.5, 134.1, 135.3, 146.1, 165.5, 170.1; Anal. Calcd for  $\text{C}_{16}\text{H}_{10}\text{ClNO}_4$ : C, 60.87; H, 3.19; N, 4.44; Found C, 60.89; H, 3.16; N, 4.46; MS:  $m/z$  315.03.

**2-(2,4-Dichlorophenylamino)-1,3-dioxo-2,3-dihydro-1H-indene-2-carboxylic acid (3j)**

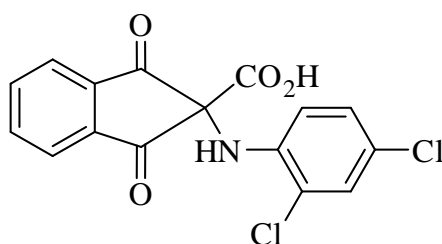

Cream powder (Yield: 76%). mp: 176 °C. IR (KBr) ( $\nu_{\max}/\text{cm}^{-1}$ ): 3423, 1774, 1663, 1605;  $^1\text{H}$  NMR (DMSO- $d_6$ , 400 MHz):  $\delta$ : 6.16 (1H, s, NH), 6.88-8.11 (7H, m, ArH), 9.68 (1H, s, OH);  $^{13}\text{C}$  NMR (DMSO- $d_6$ , 100 MHz):  $\delta$ : 70.1, 123.3, 124.8, 128.0, 128.1, 128.3, 128.6, 129.2, 130.2, 131.0, 132.2, 134.0, 141.0, 169.6, 171.2; Anal. Calcd for  $\text{C}_{16}\text{H}_9\text{Cl}_2\text{NO}_4$ : C, 54.88; H, 2.59; N, 4.00; Found C, 54.83; H, 2.63; N, 4.06; MS:  $m/z$  348.99.

**2-(4-Nitrophenylamino)-1,3-dioxo-2,3-dihydro-1H-indene-2-carboxylic acid (3k)**

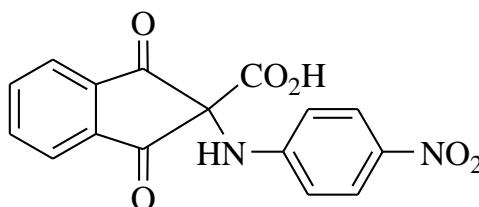

Yellow powder (Yield: 70%). mp: 250 °C. IR (KBr) ( $\nu_{\max}$ /  $\text{cm}^{-1}$ ): 3317, 1788, 1692, 1600;  $^1\text{H}$  NMR (DMSO- $d_6$ , 400 MHz):  $\delta$ : 6.28 (1H, s, NH), 7.80-8.25 (8H, m, ArH), 12.20 (1H, s, OH);  $^{13}\text{C}$  NMR (DMSO- $d_6$ , 100 MHz):  $\delta$ : 79.1, 120.4, 123.3, 124.8, 125.3, 125.8, 130.7, 135.4, 143.5, 144.4, 145.7, 166.0, 170.0; Anal. Calcd for  $\text{C}_{16}\text{H}_{10}\text{N}_2\text{O}_6$ : C, 58.90; H, 3.09; N, 8.59; Found C, 58.93; H, 3.11; N, 8.62; MS:  $m/z$  326.05.

**2-(3-Nitrophenylamino)-1,3-dioxo-2,3-dihydro-1H-indene-2-carboxylic acid (3l)**

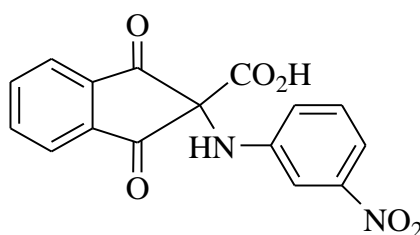

Cream powder (Yield: 72%). mp: 202 °C. IR (KBr) ( $\nu_{\max}$ /  $\text{cm}^{-1}$ ): 3322, 1738, 1688, 1600;  $^1\text{H}$  NMR (DMSO- $d_6$ , 400 MHz):  $\delta$ : 6.24 (1H, s, NH), 6.66-8.58 (8H, m, ArH), 11.00 (1H, s, OH);  $^{13}\text{C}$  NMR (DMSO- $d_6$ , 100 MHz):  $\delta$ : 79.0, 114.8, 119.3, 123.3, 124.8, 125.7, 126.5, 130.6, 130.7, 135.4, 139.4, 145.8, 148.4, 165.9, 169.9; Anal. Calcd for  $\text{C}_{16}\text{H}_{10}\text{N}_2\text{O}_6$ : C, 58.90; H, 4.21; N, 8.59; Found C, 58.92; H, 4.18; N, 8.62; MS:  $m/z$  326.05.

**2,2'-(4,4'-Oxybis(4,1-phenylene)bis(azanediyl))bis(1,3-dioxo-2,3-dihydro-1H-indene-2-carboxylic acid) (3m)**

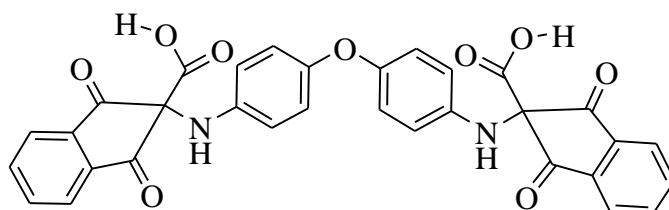

Yellow powder (Yield: 85%). mp: 187 °C. IR (KBr) ( $\nu_{\max}$ /  $\text{cm}^{-1}$ ): 3407, 1773, 1679, 1607;  $^1\text{H}$  NMR (DMSO- $d_6$ , 400 MHz):  $\delta$ : 6.18 (1H, s, NH), 6.95-7.90 (8H, m, ArH), 10.59 (1H, s, OH);  $^{13}\text{C}$  NMR (DMSO- $d_6$ , 100 MHz):  $\delta$ : 79.1, 119.2, 122.2, 123.1, 124.9, 125.7, 130.5, 135.3, 146.3, 153.6, 164.8, 170.2; Anal. Calcd for  $\text{C}_{32}\text{H}_{20}\text{N}_2\text{O}_9$ : C, 66.67; H, 3.50; N, 4.86; Found C, 66.69; H, 3.47; N, 4.89; MS:  $m/z$  576.12.

Due to very low solubility of the products **3n**, we cannot report the  $^{13}\text{C}$  NMR data for this product.

**2,2'-(4,4'-Sulfonylbis(4,1-phenylene)bis(azanediyl))bis(1,3-dioxo-2,3-dihydro-1H-indene-2-carboxylic acid) (3n)**

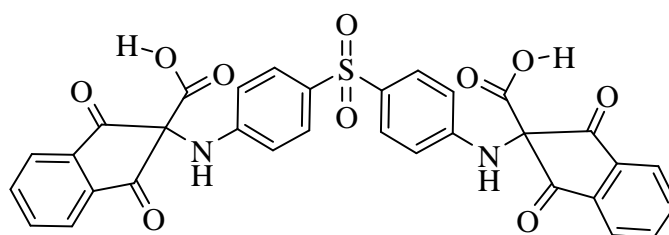

Yellow powder (Yield: 83%). mp: 165 °C. IR (KBr) ( $\nu_{\max}$ /  $\text{cm}^{-1}$ ): 3441, 1777, 1694, 1593;  $^1\text{H}$  NMR (DMSO- $d_6$ , 400 MHz):  $\delta$ : 6.22 (2H, s, 2NH), 7.64-7.88 (16H, m, ArH), 10.99 (2H, s, 2OH); Anal. Calcd for  $\text{C}_{32}\text{H}_{20}\text{N}_2\text{O}_{10}\text{S}$ : C, 61.54; H, 3.23; N, 4.49; Found C, 61.59; H, 3.27; N, 4.46; MS:  $m/z$  624.08.



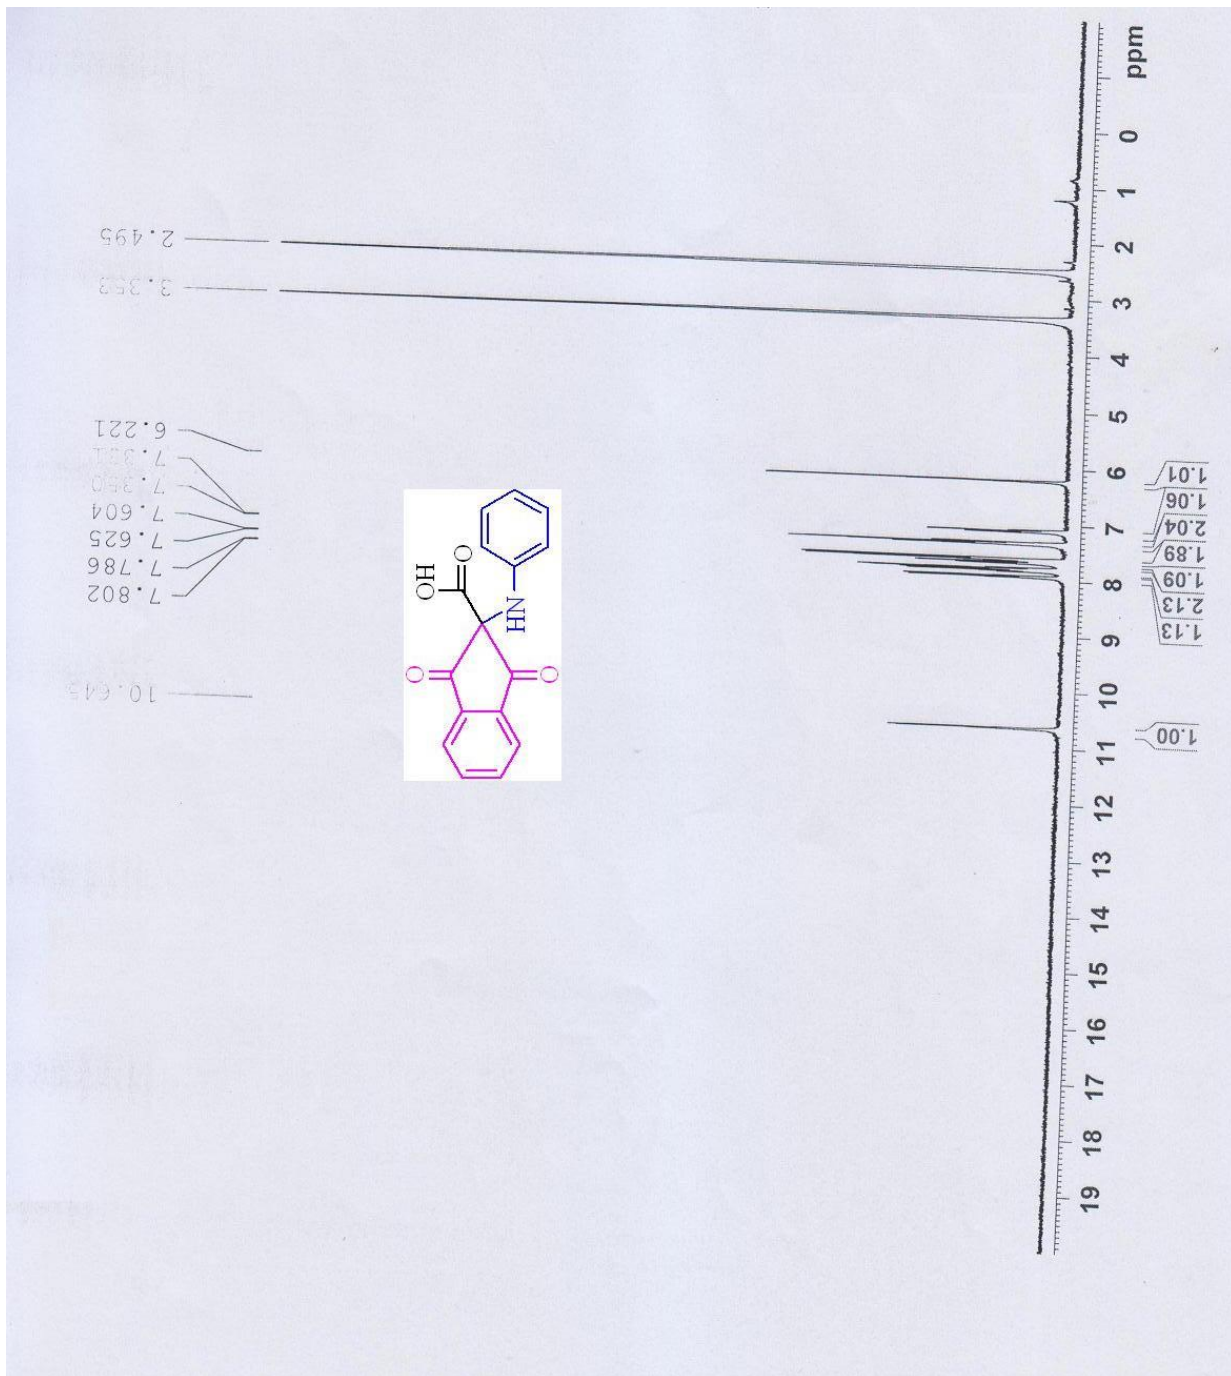

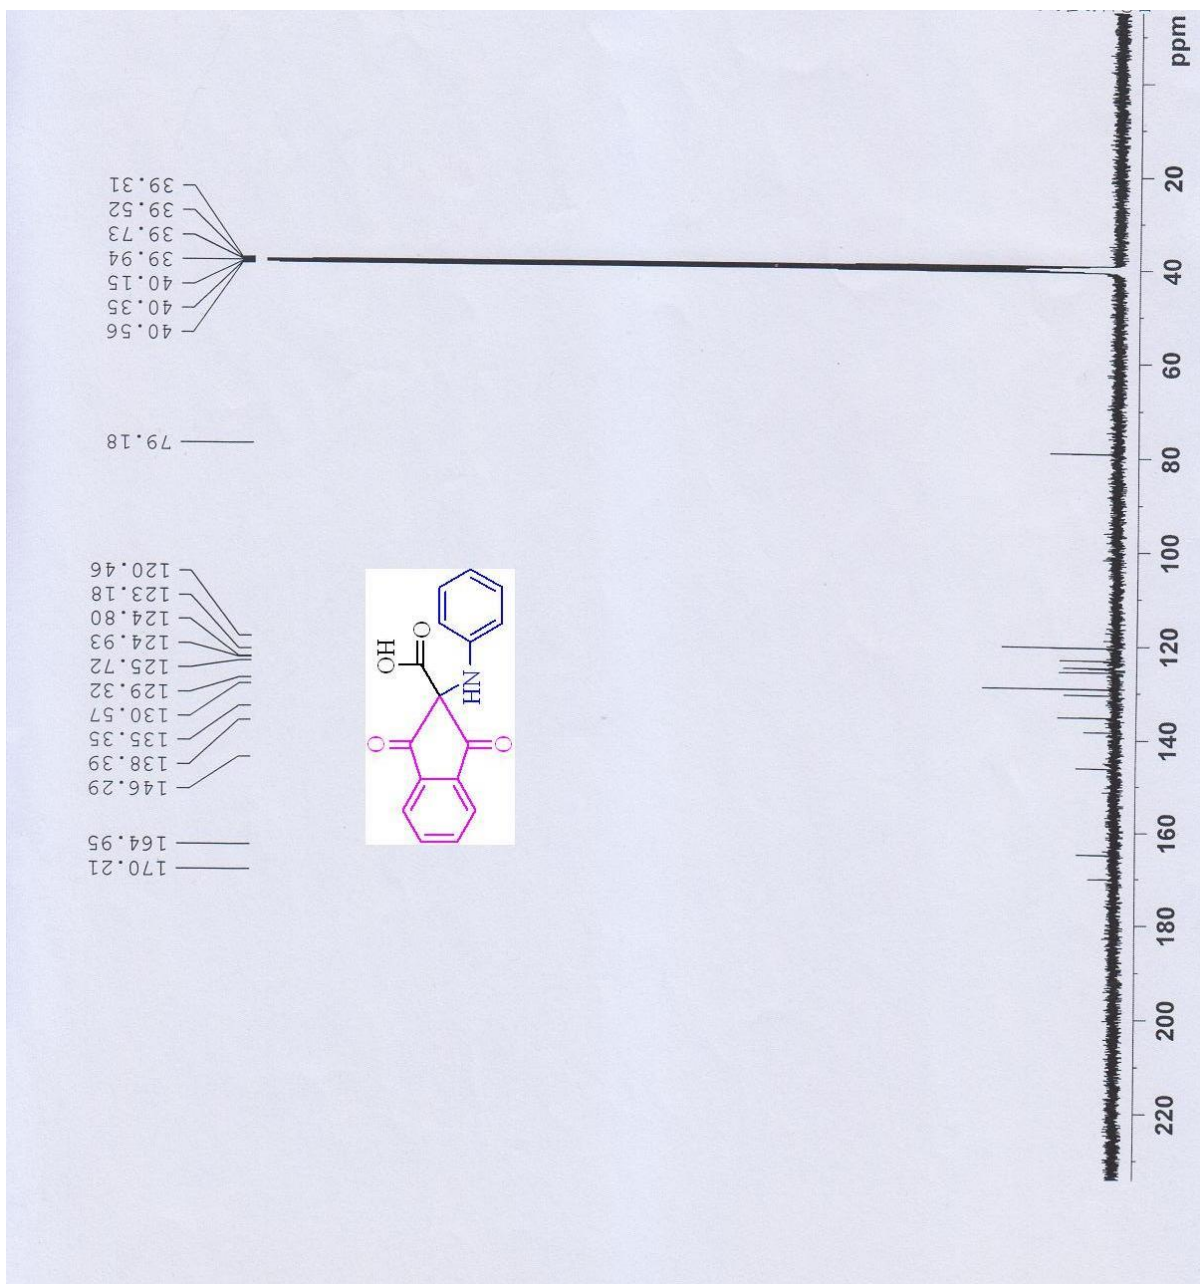

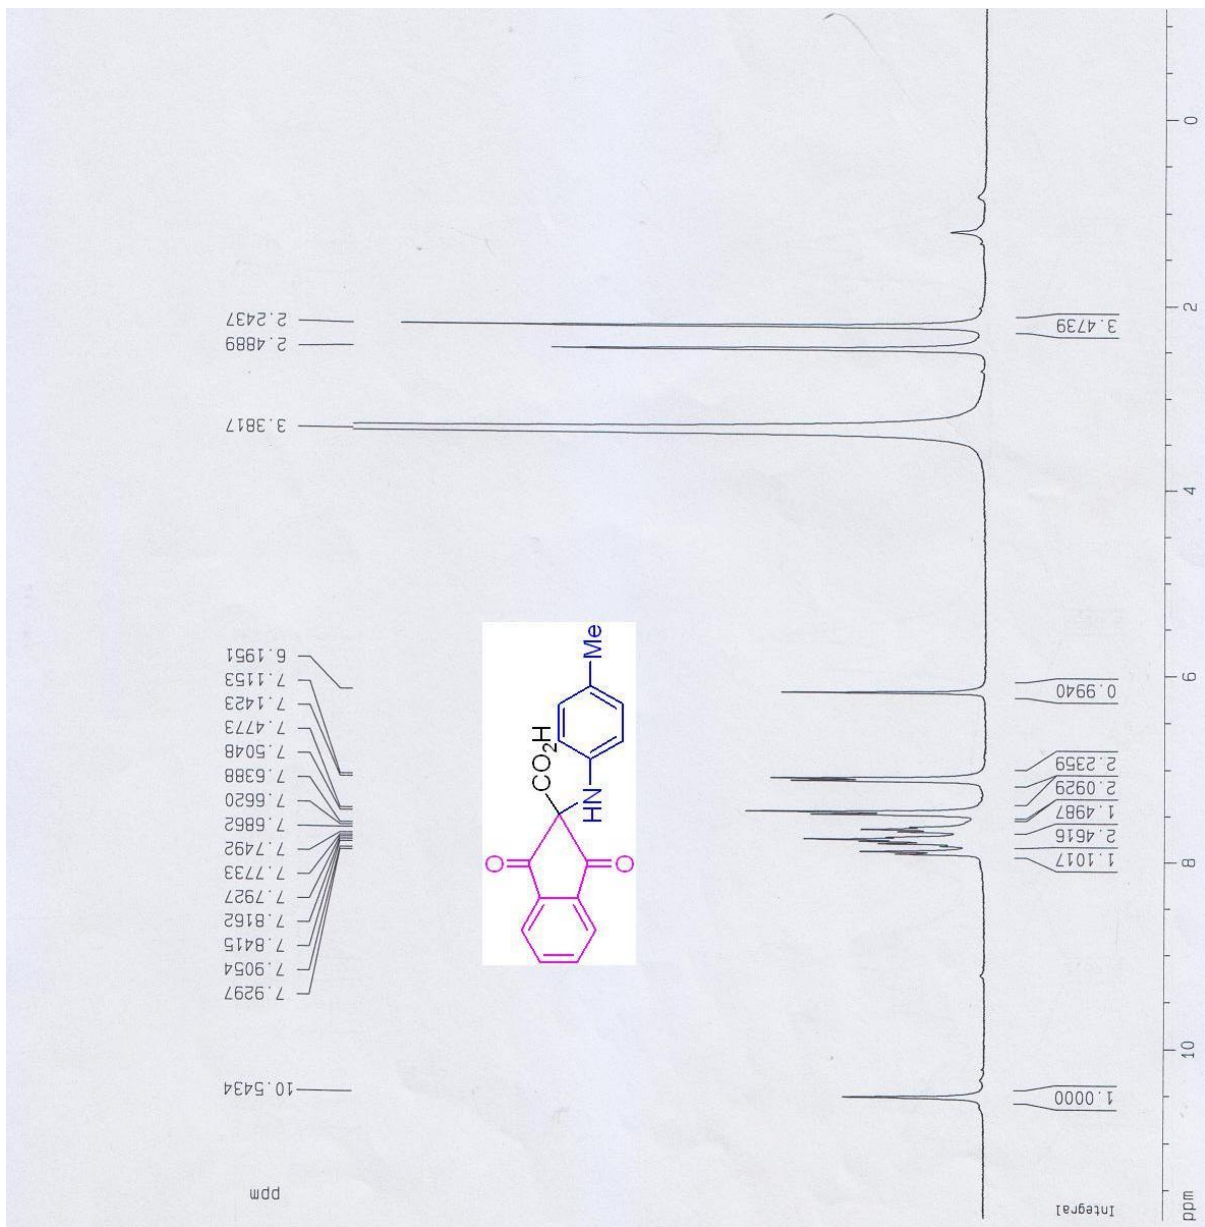

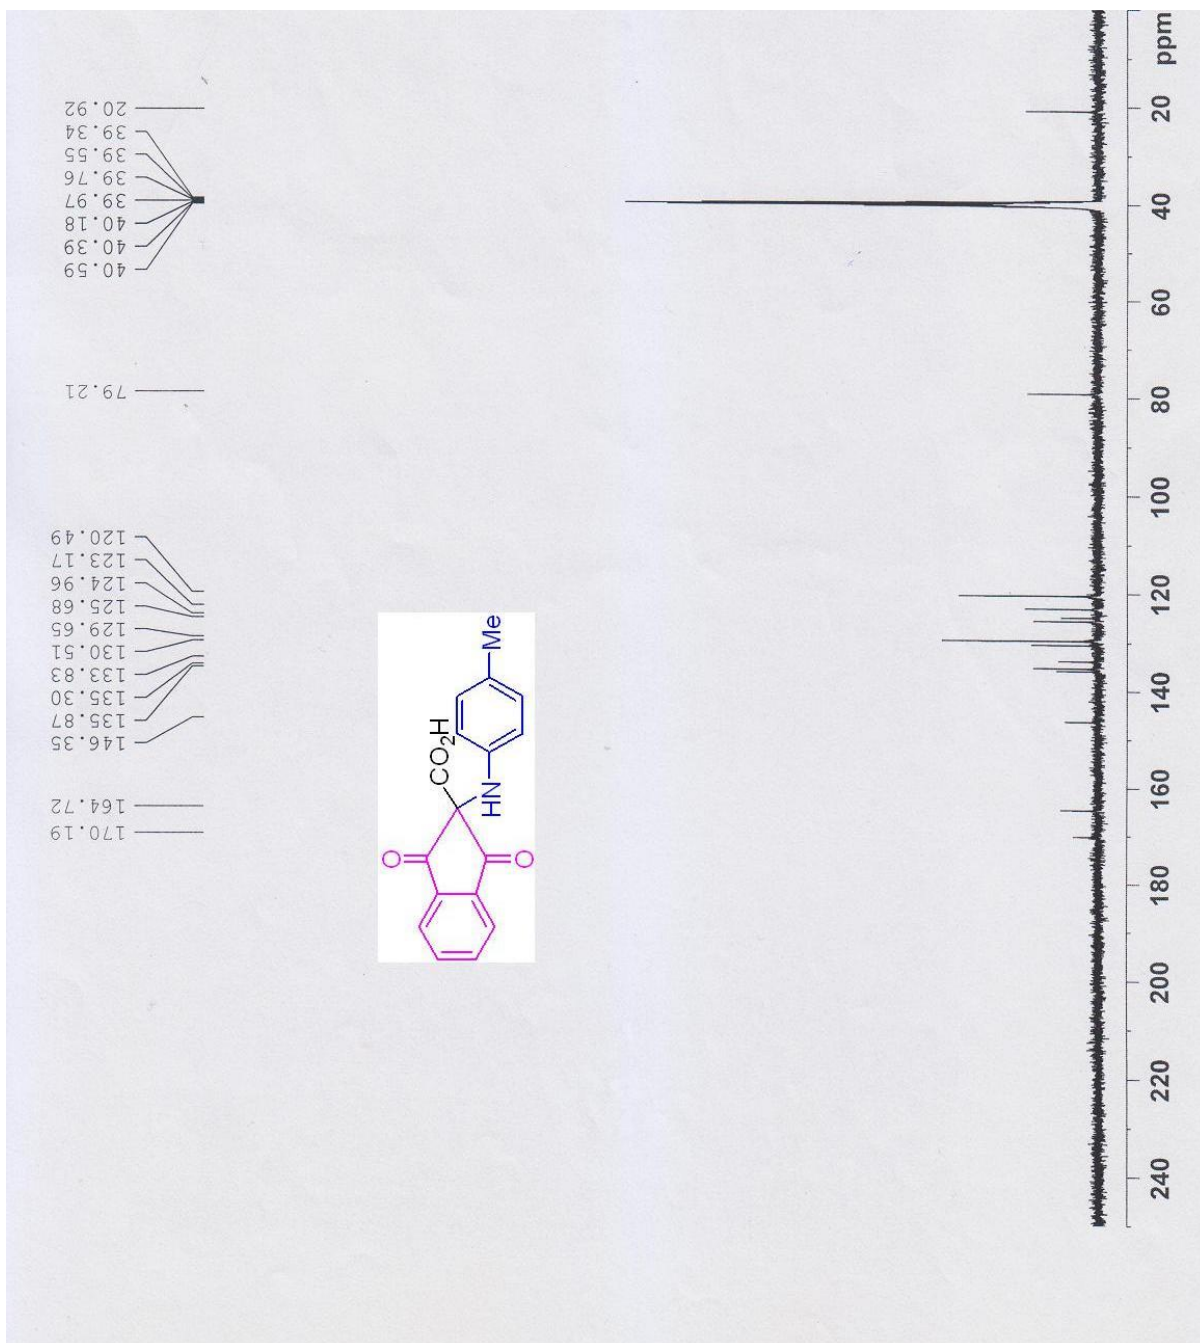

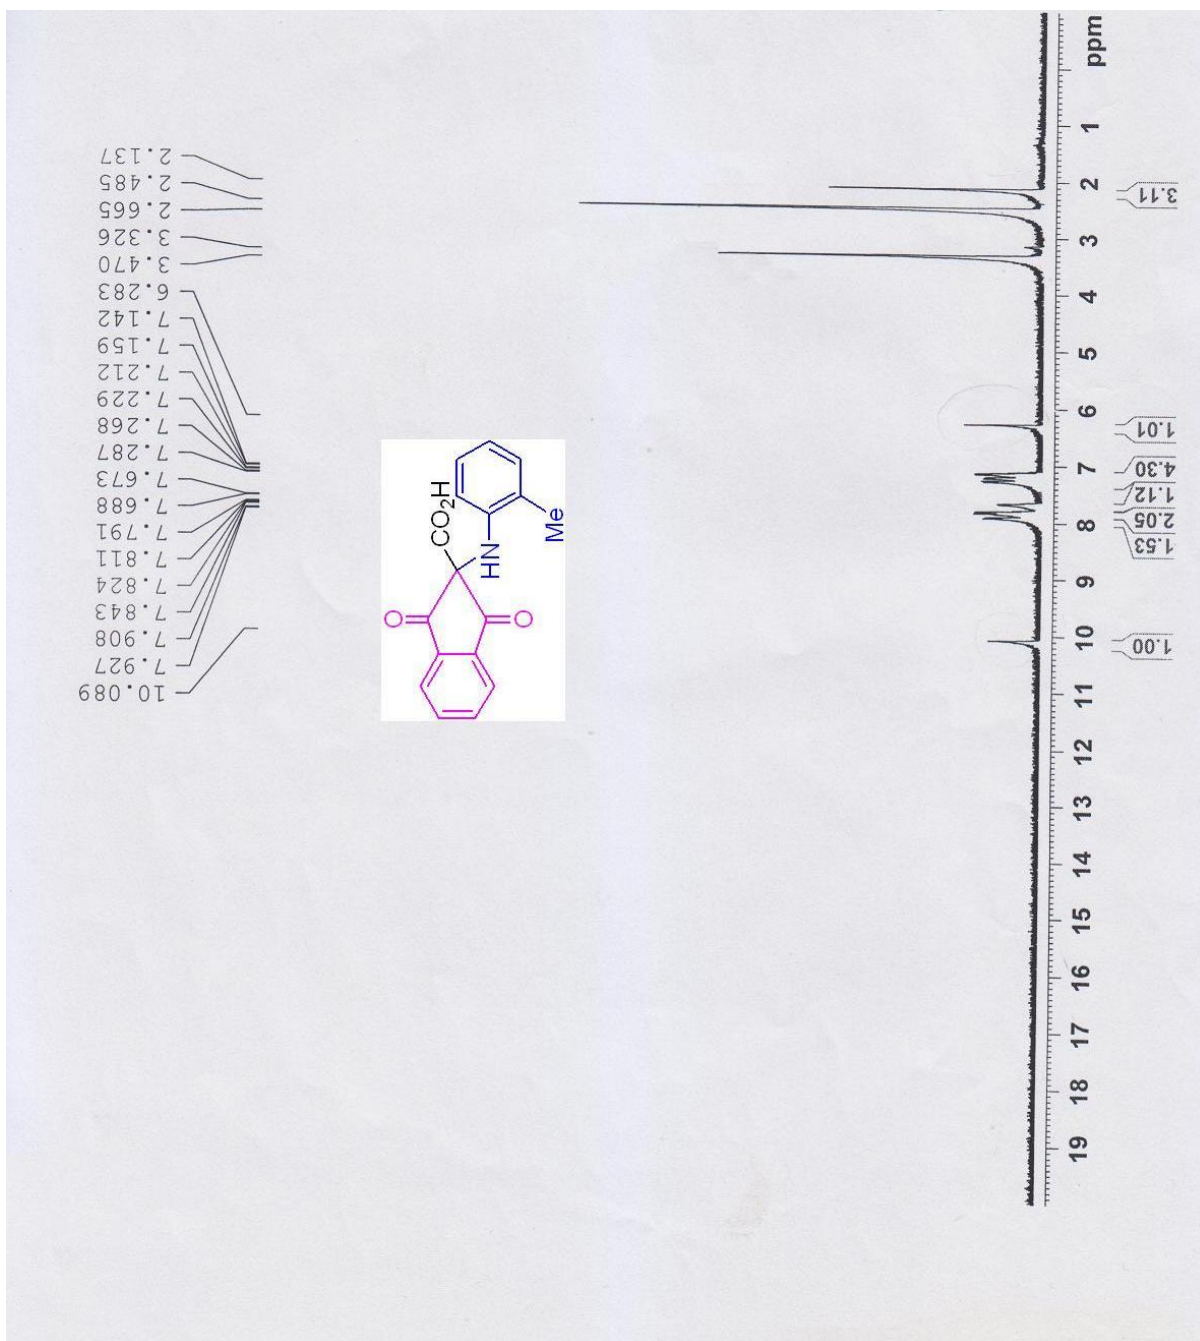



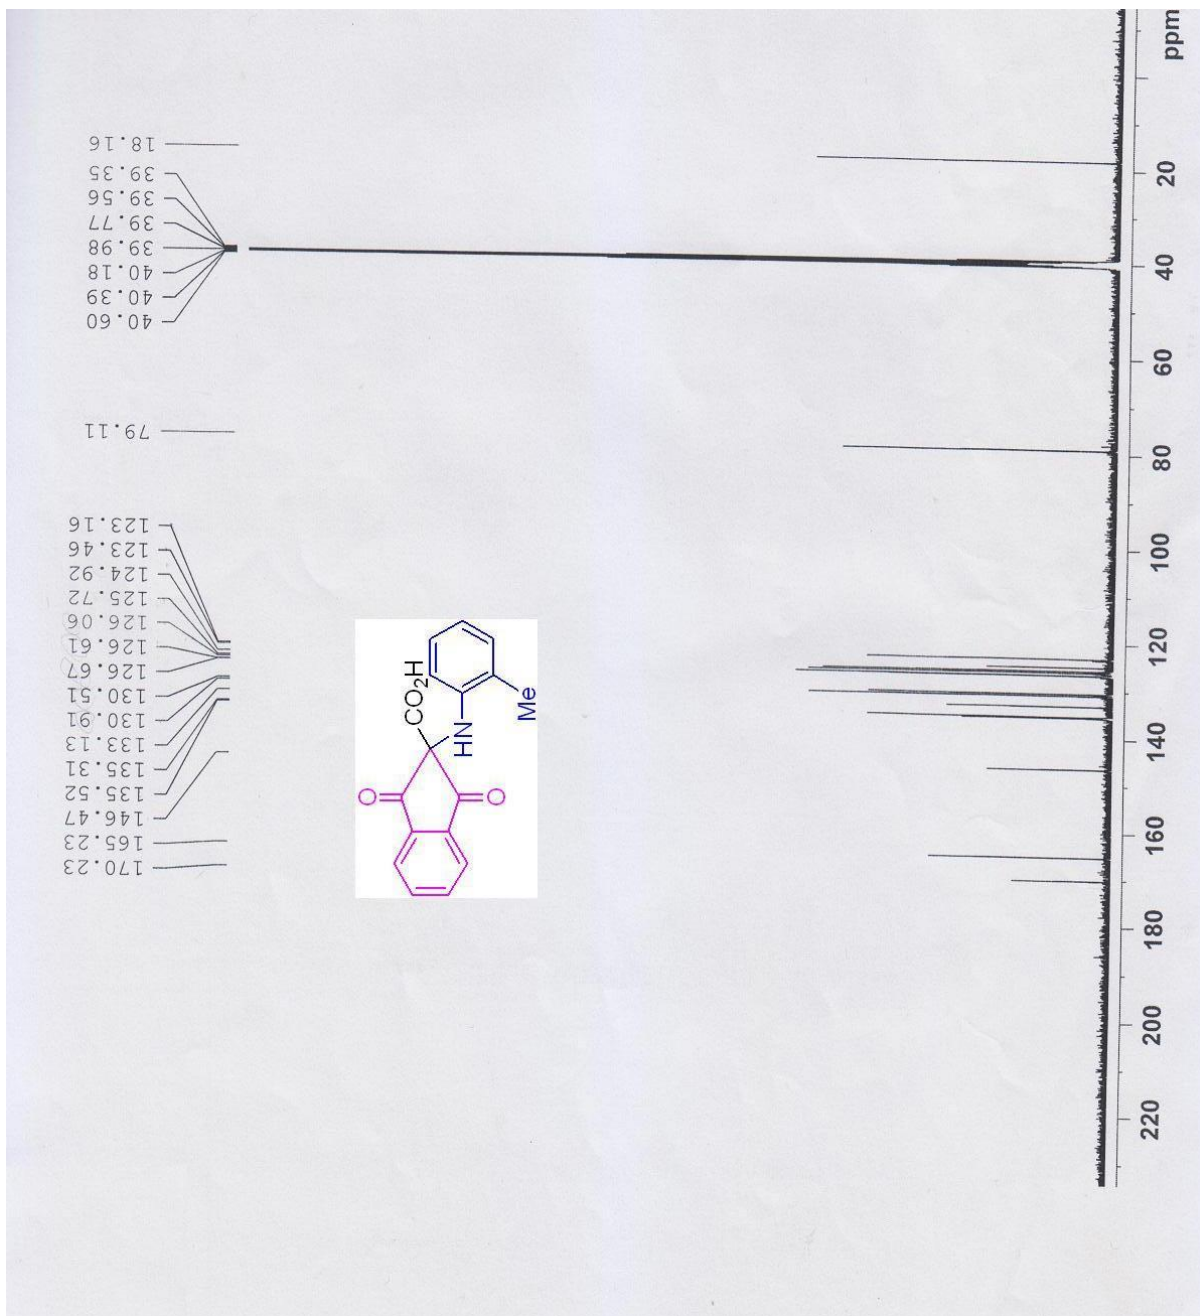

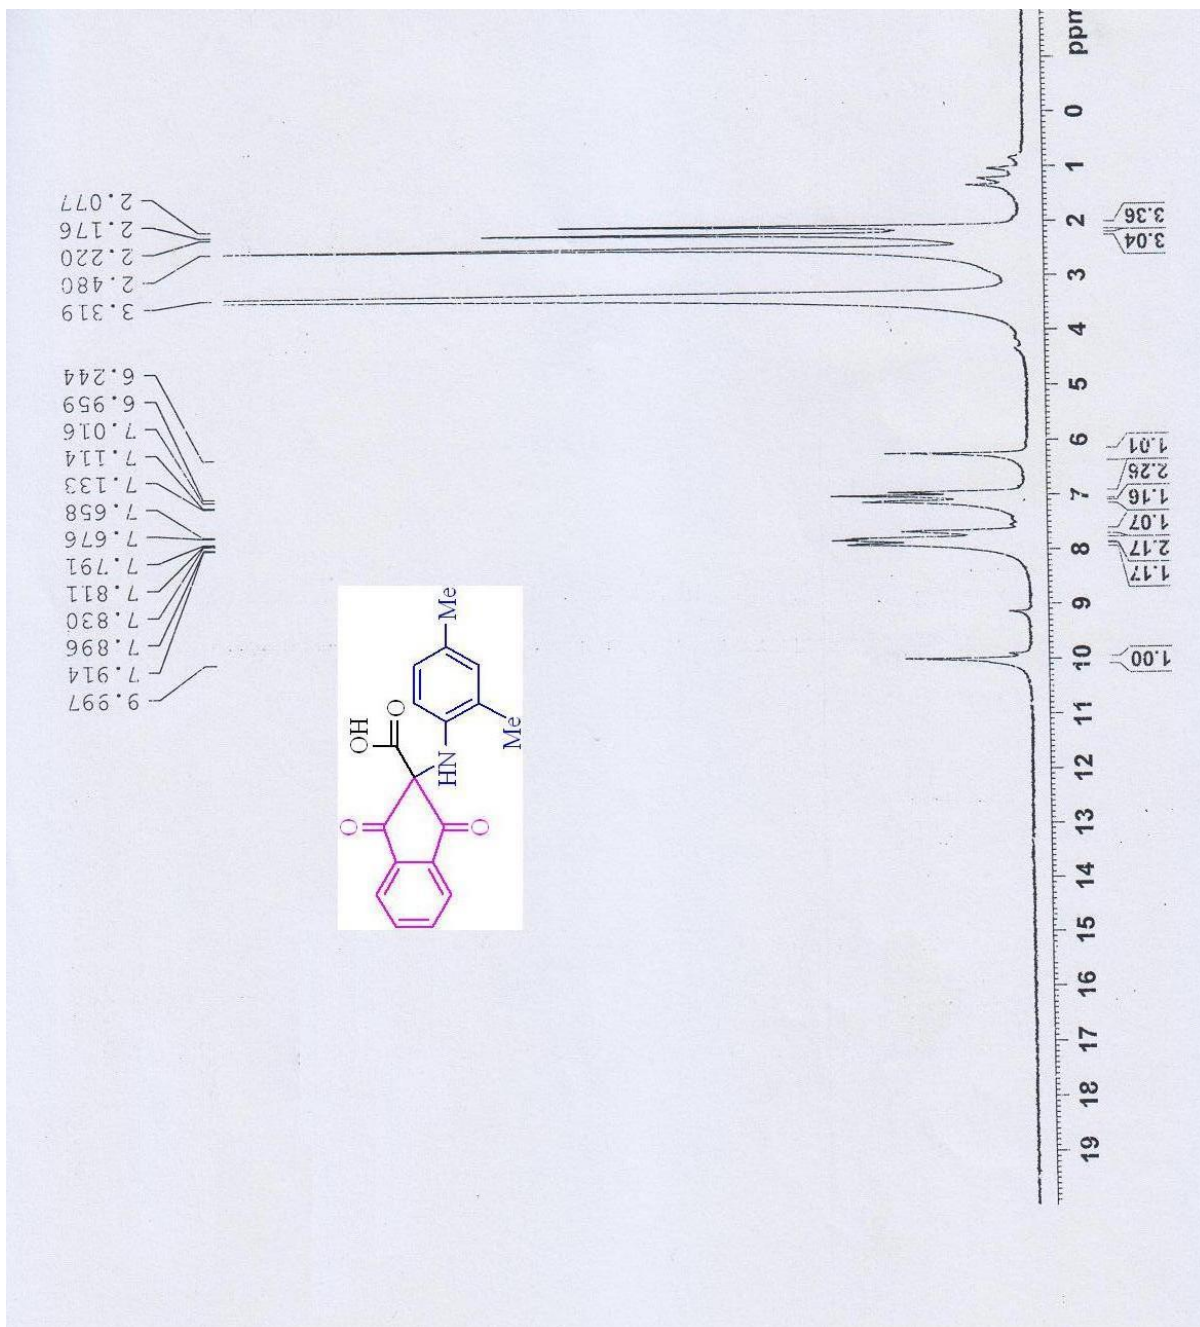



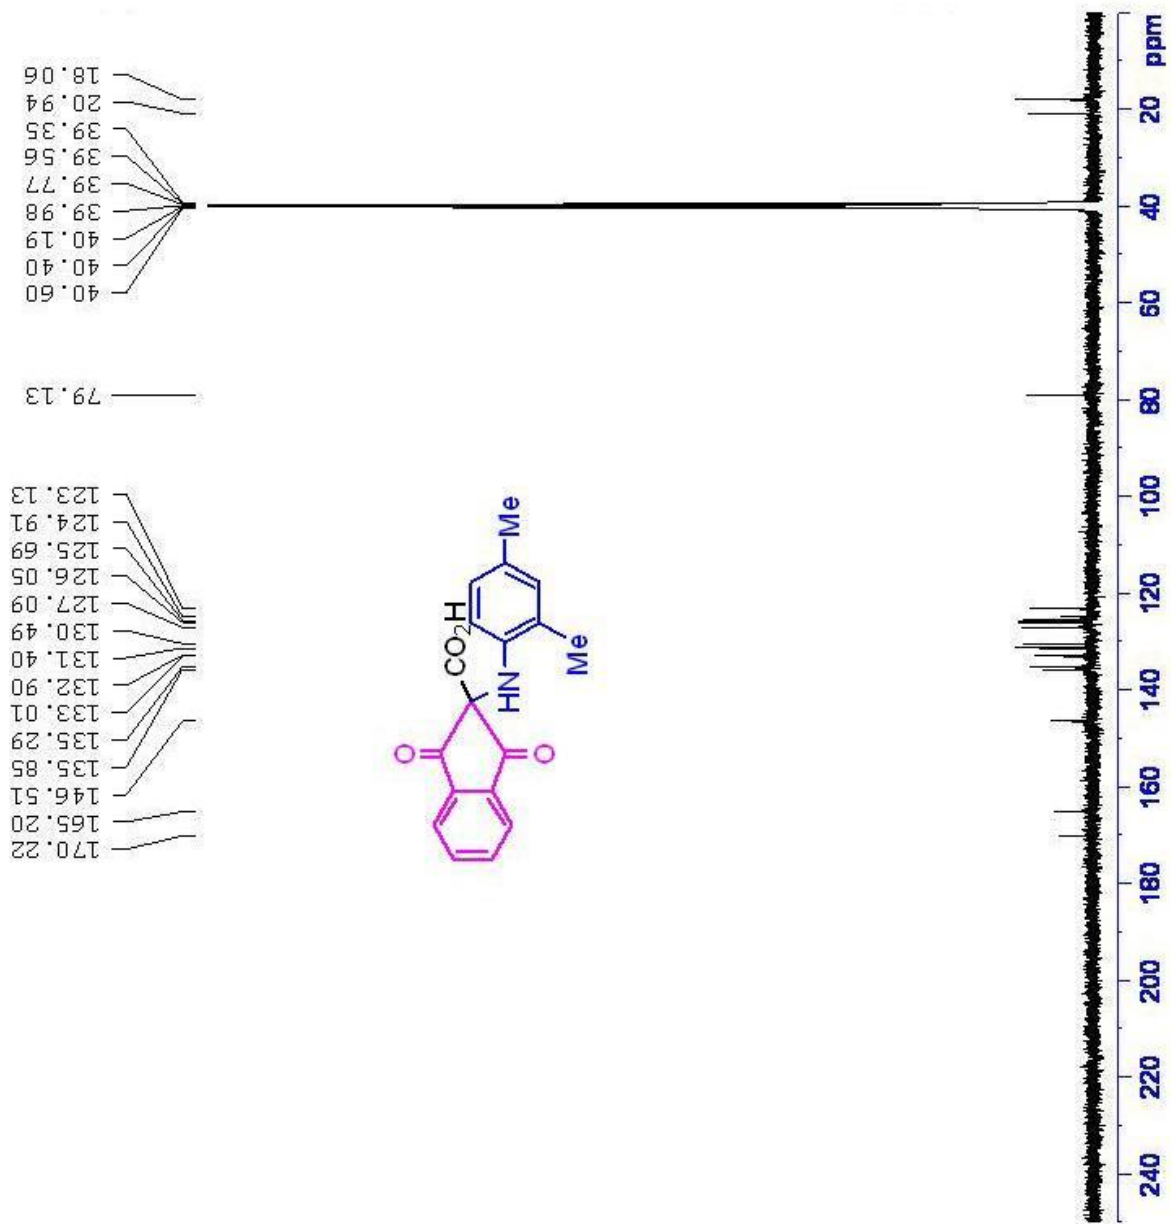

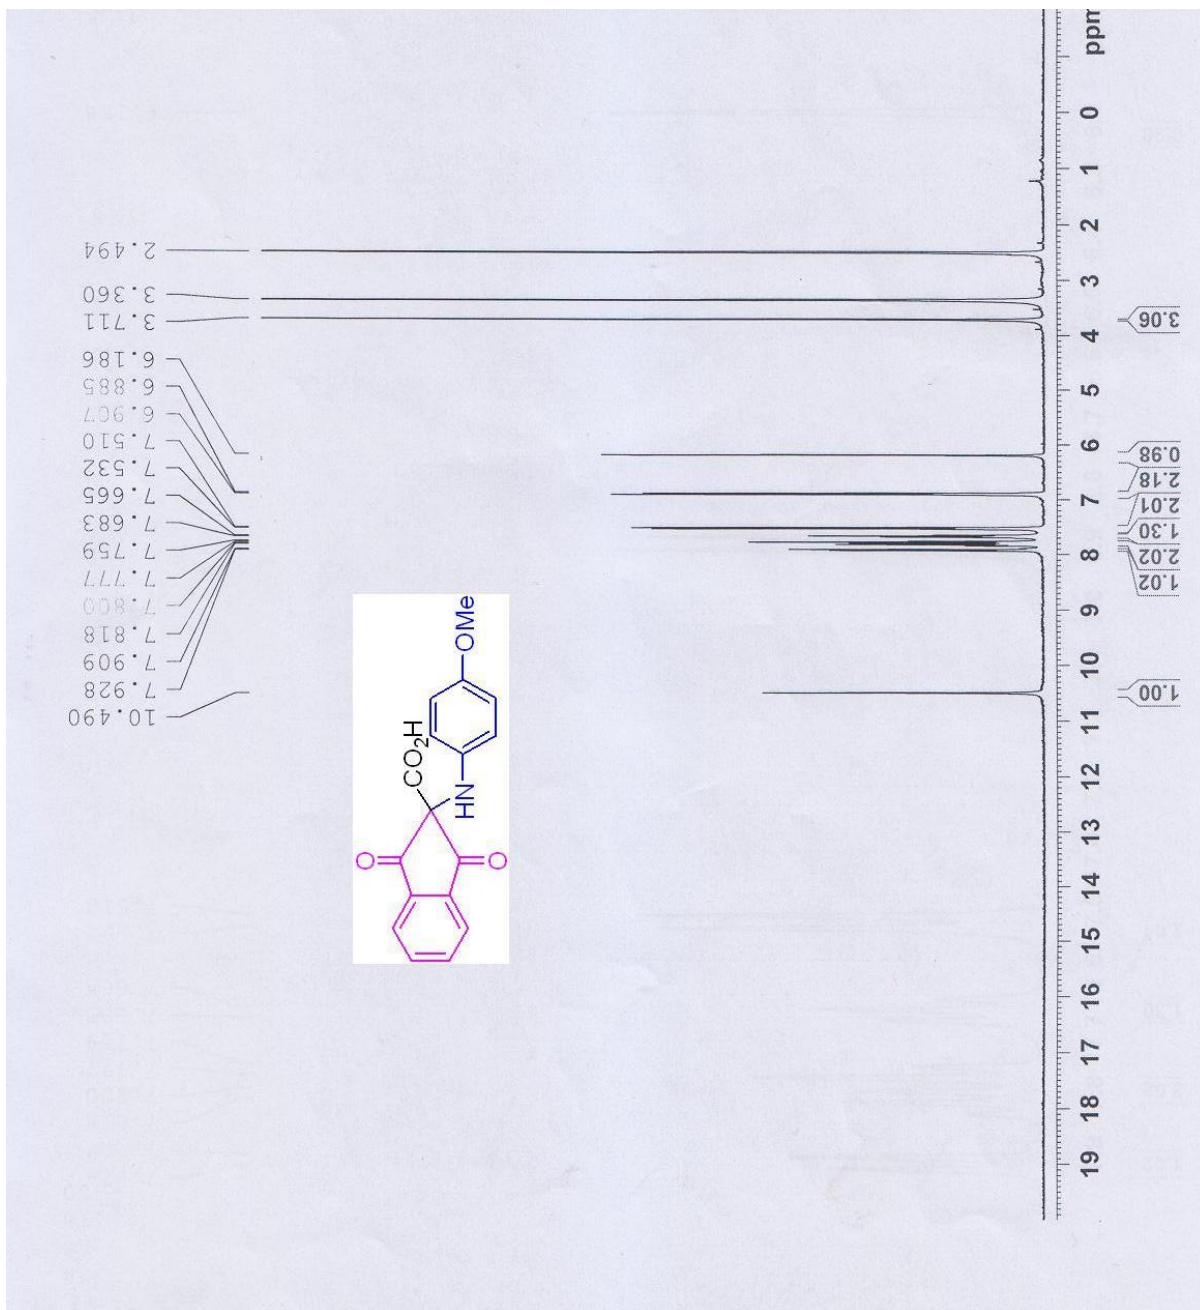

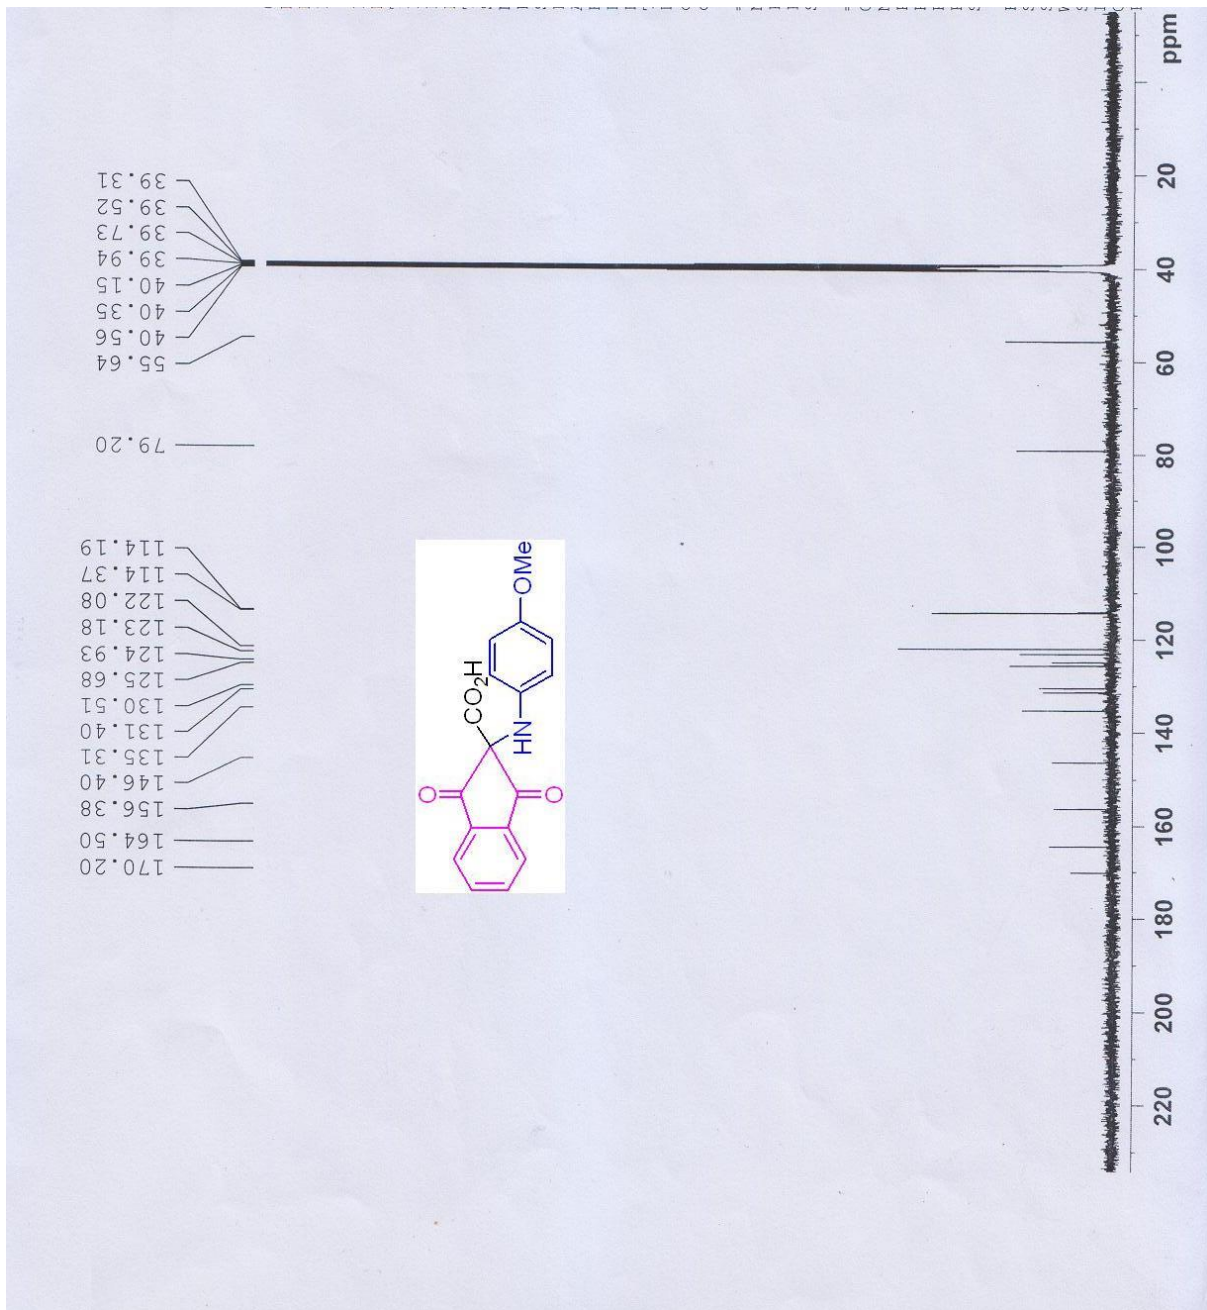

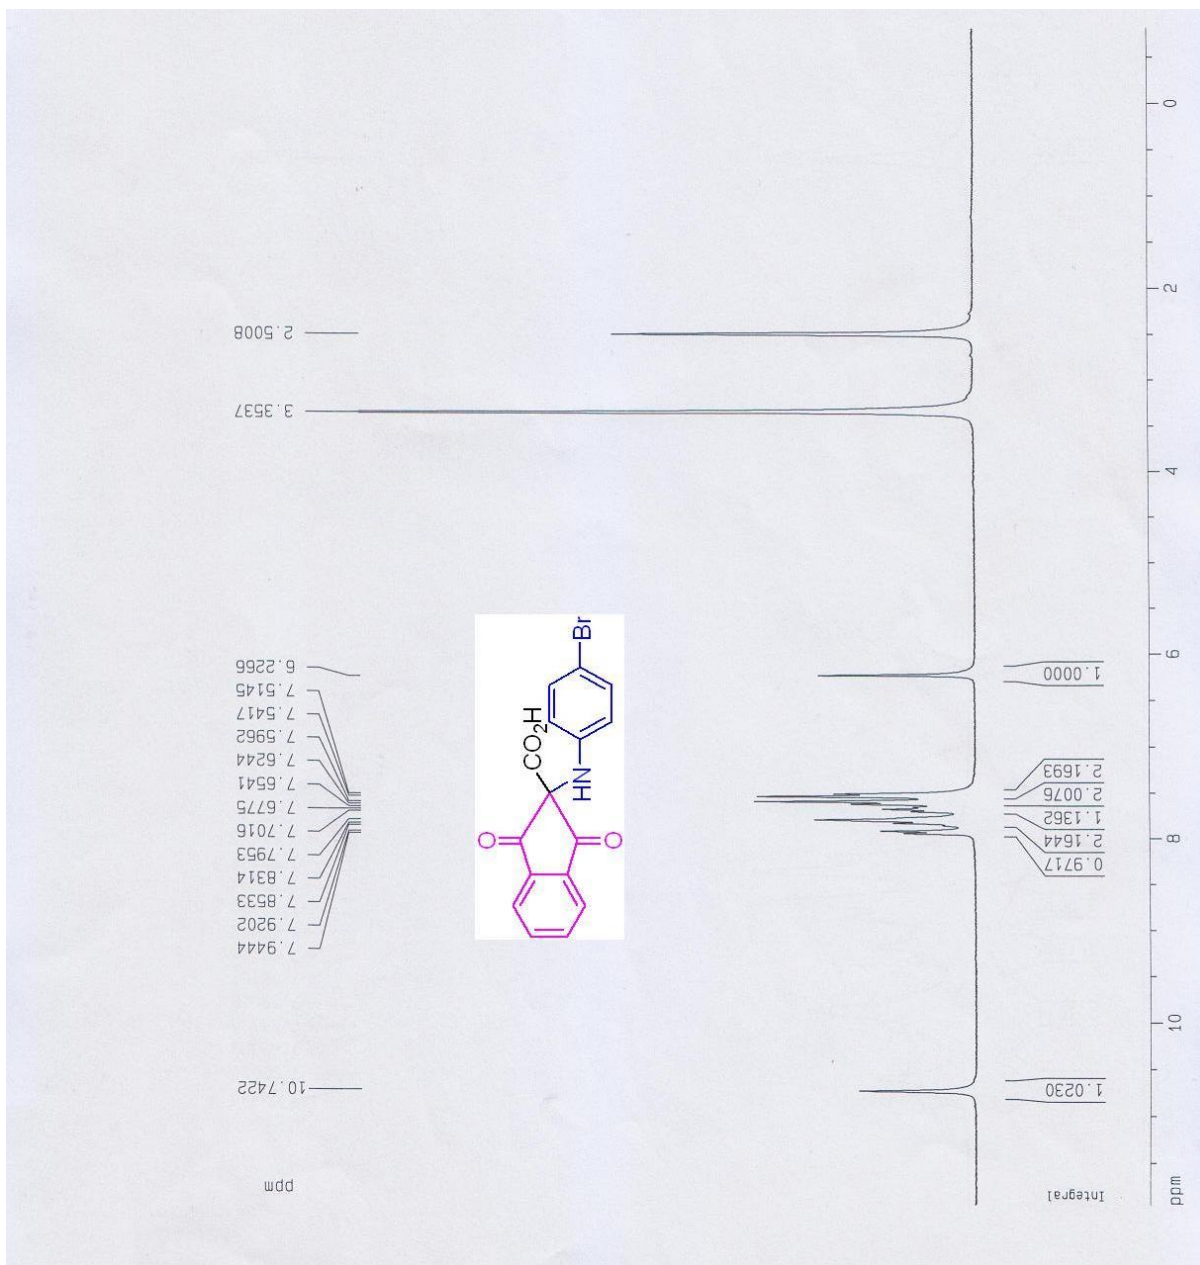

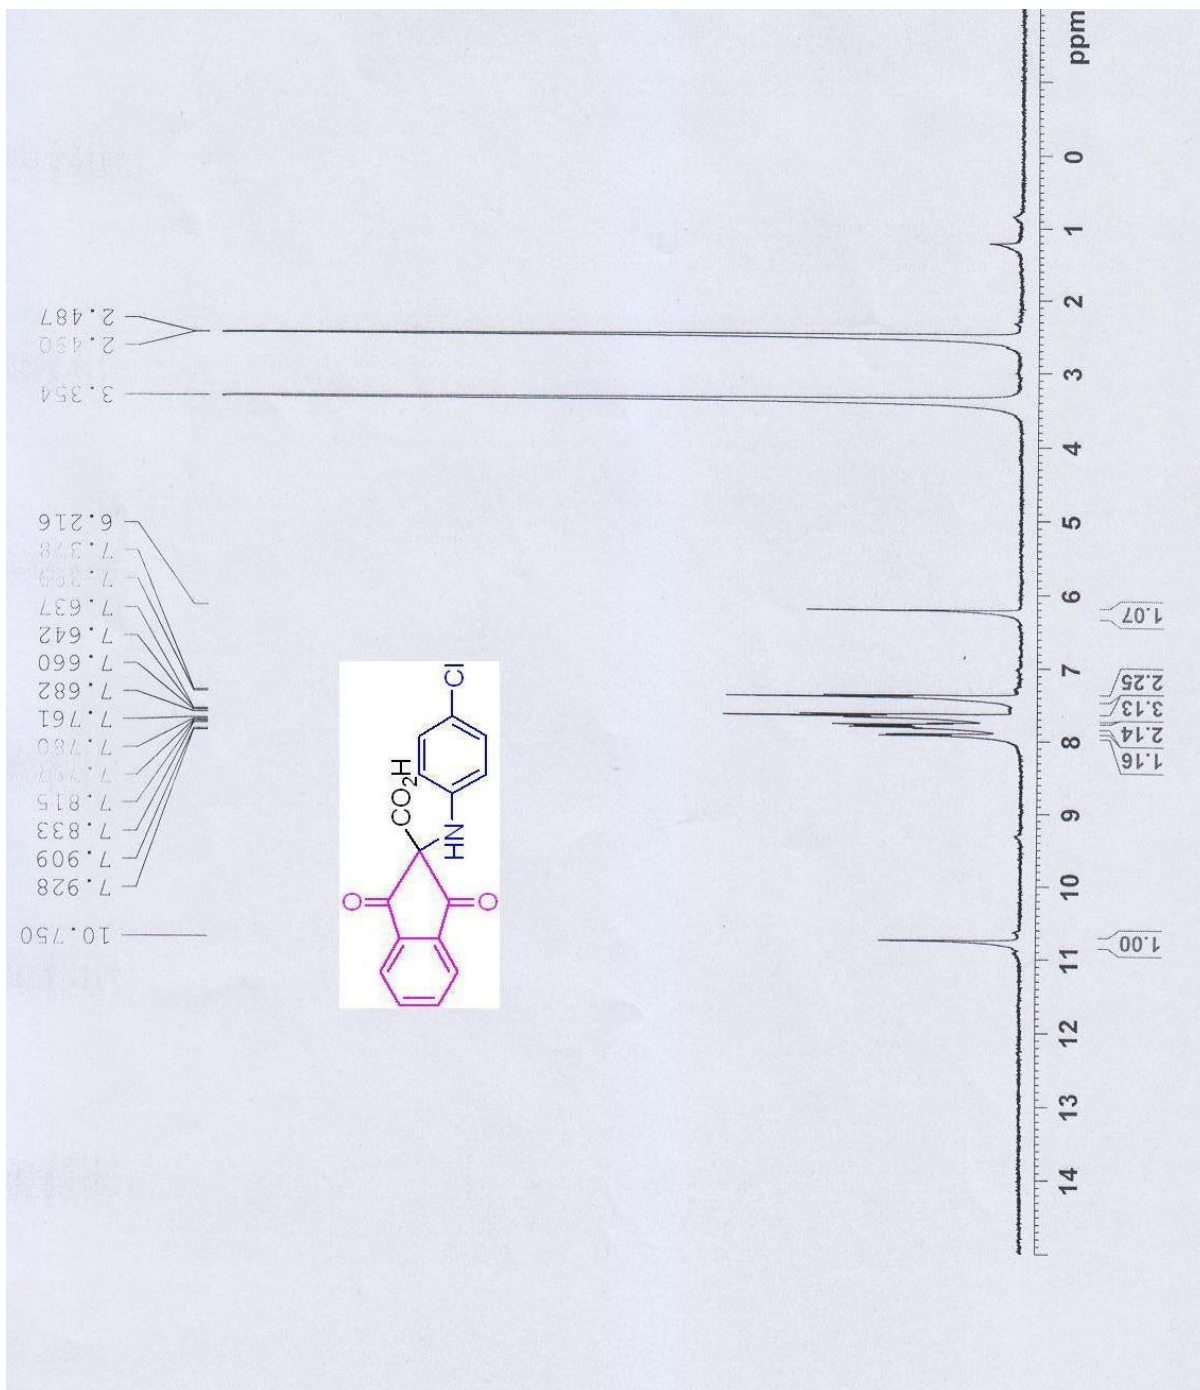

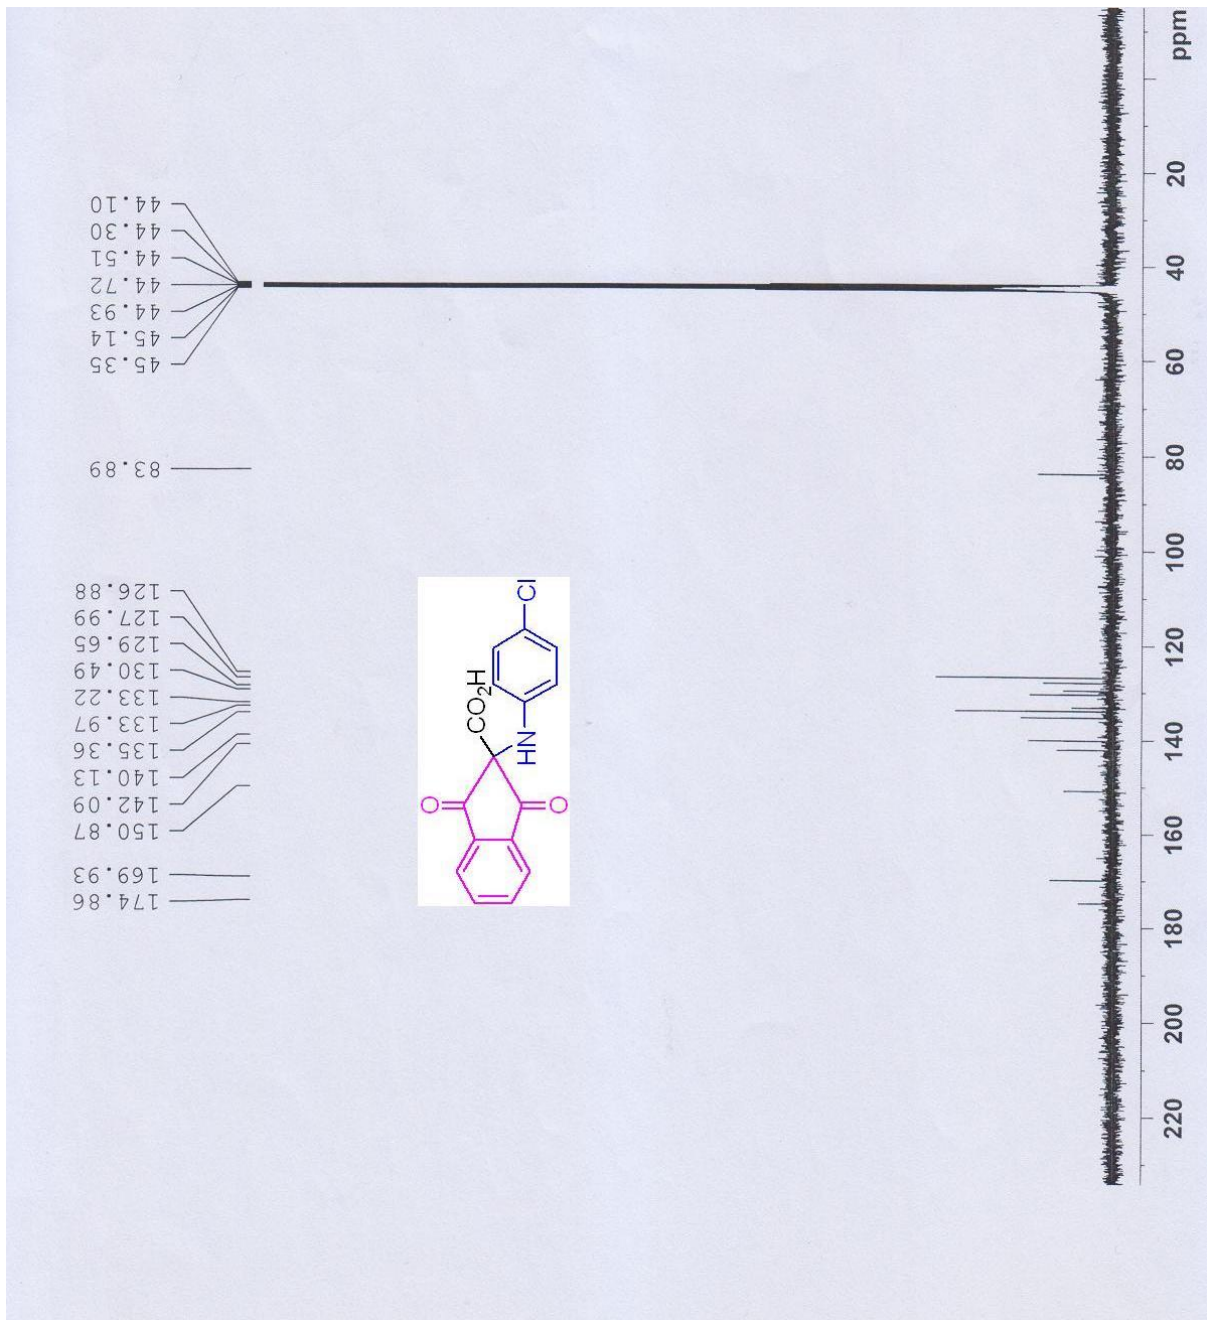

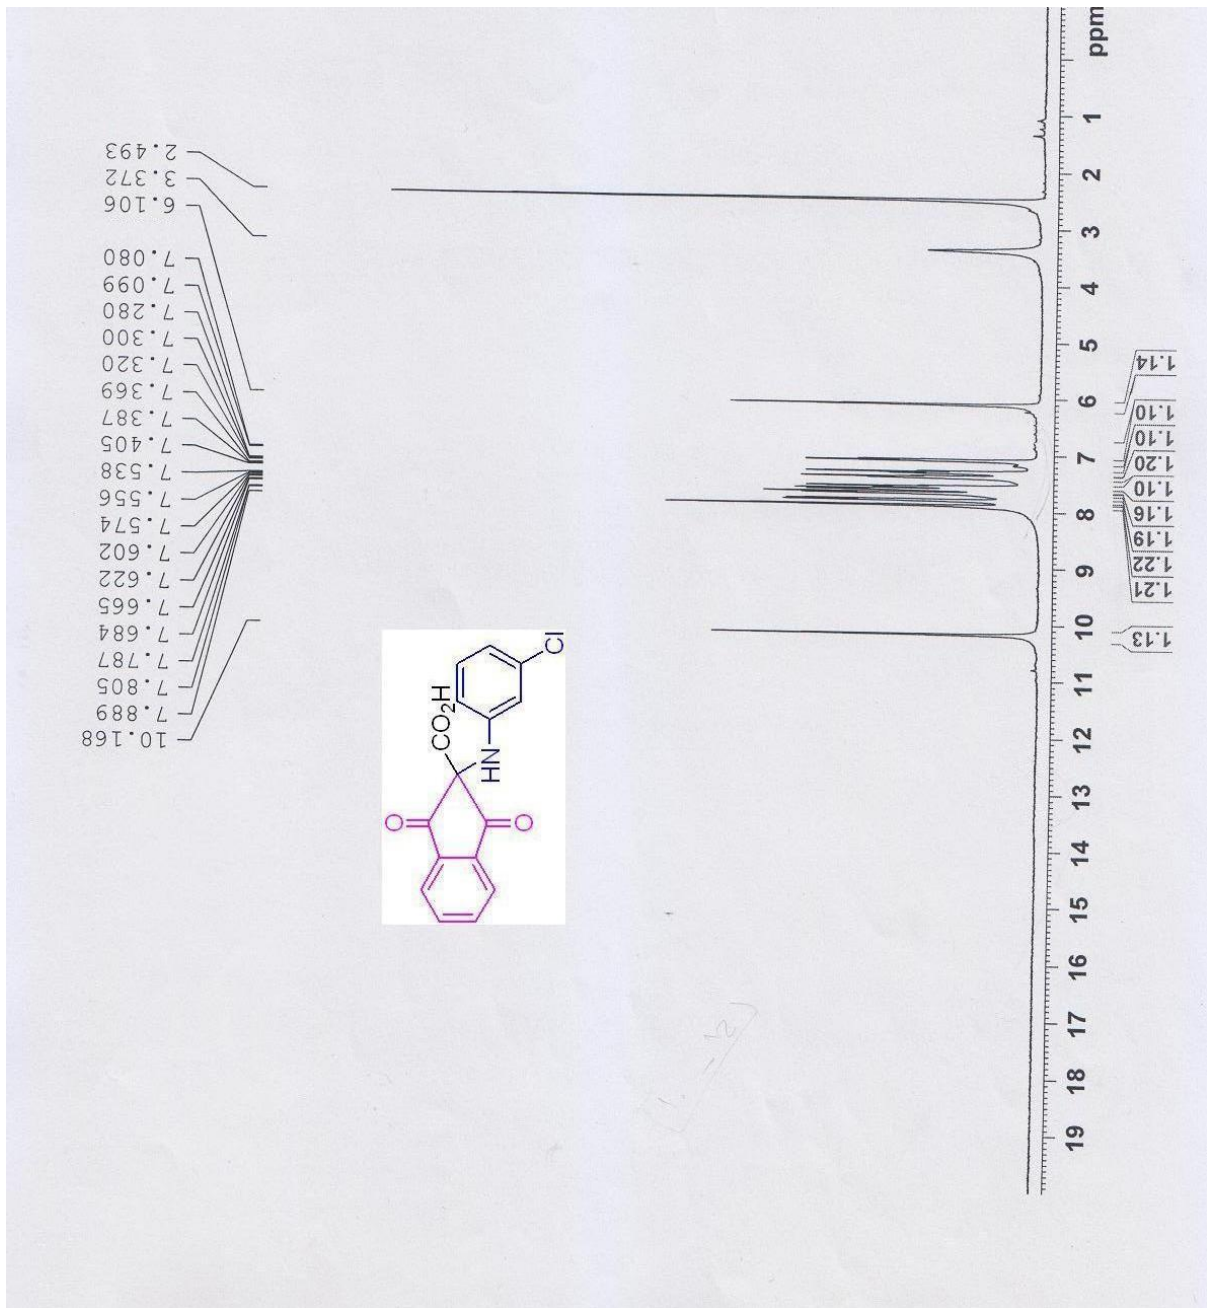

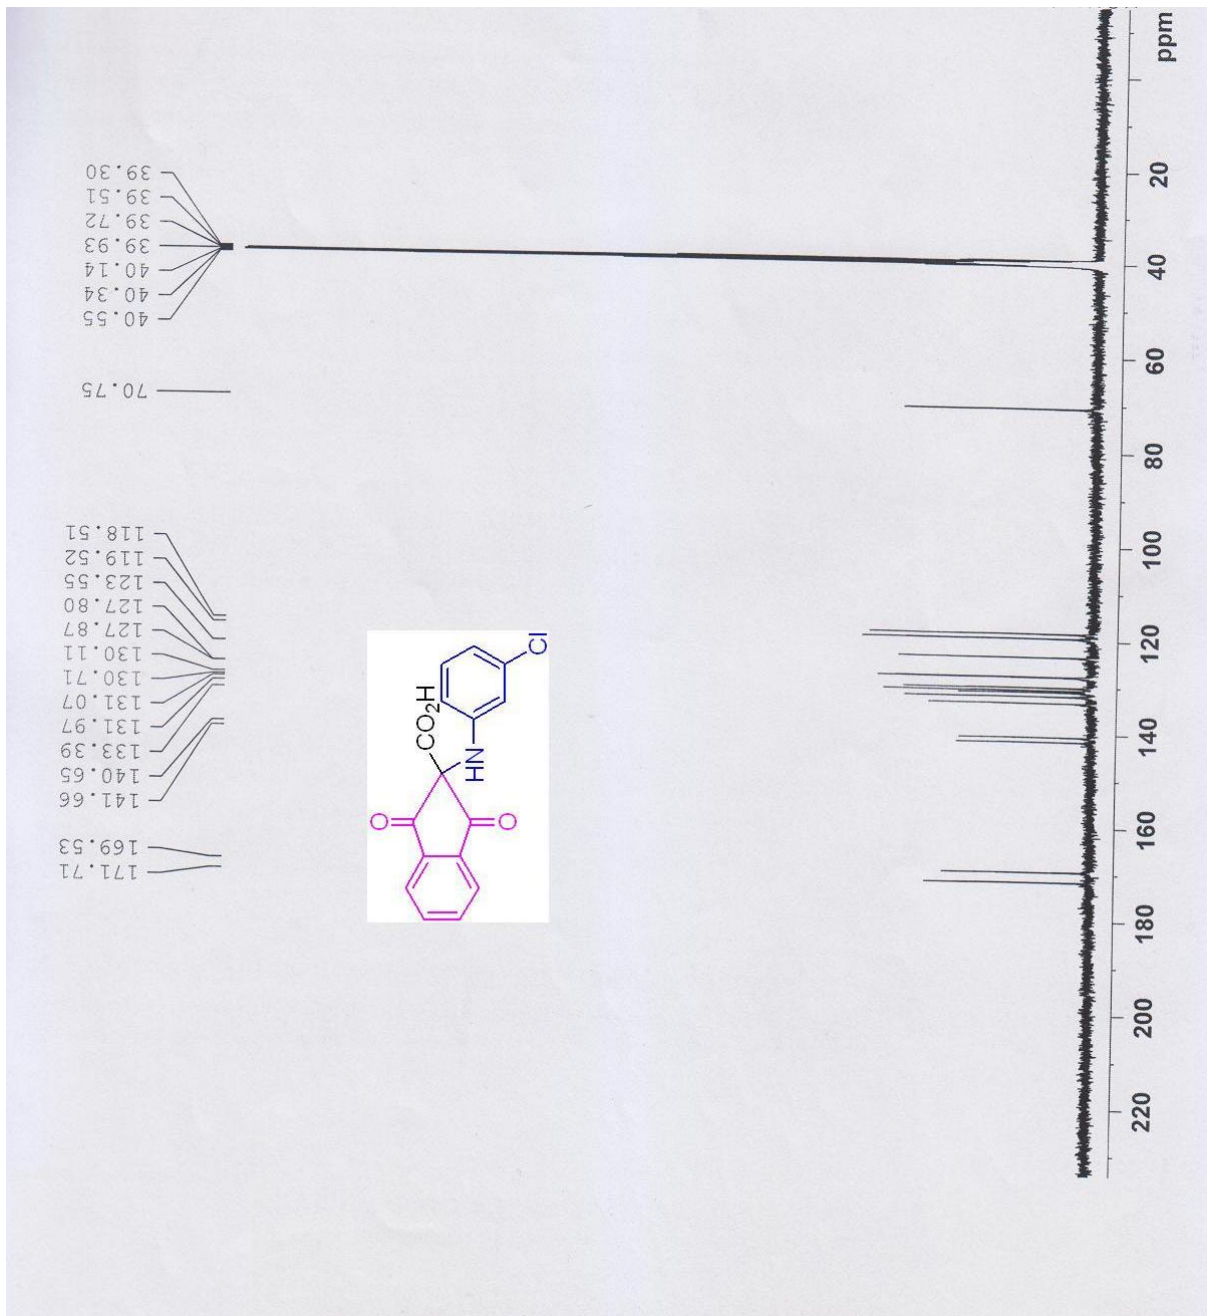



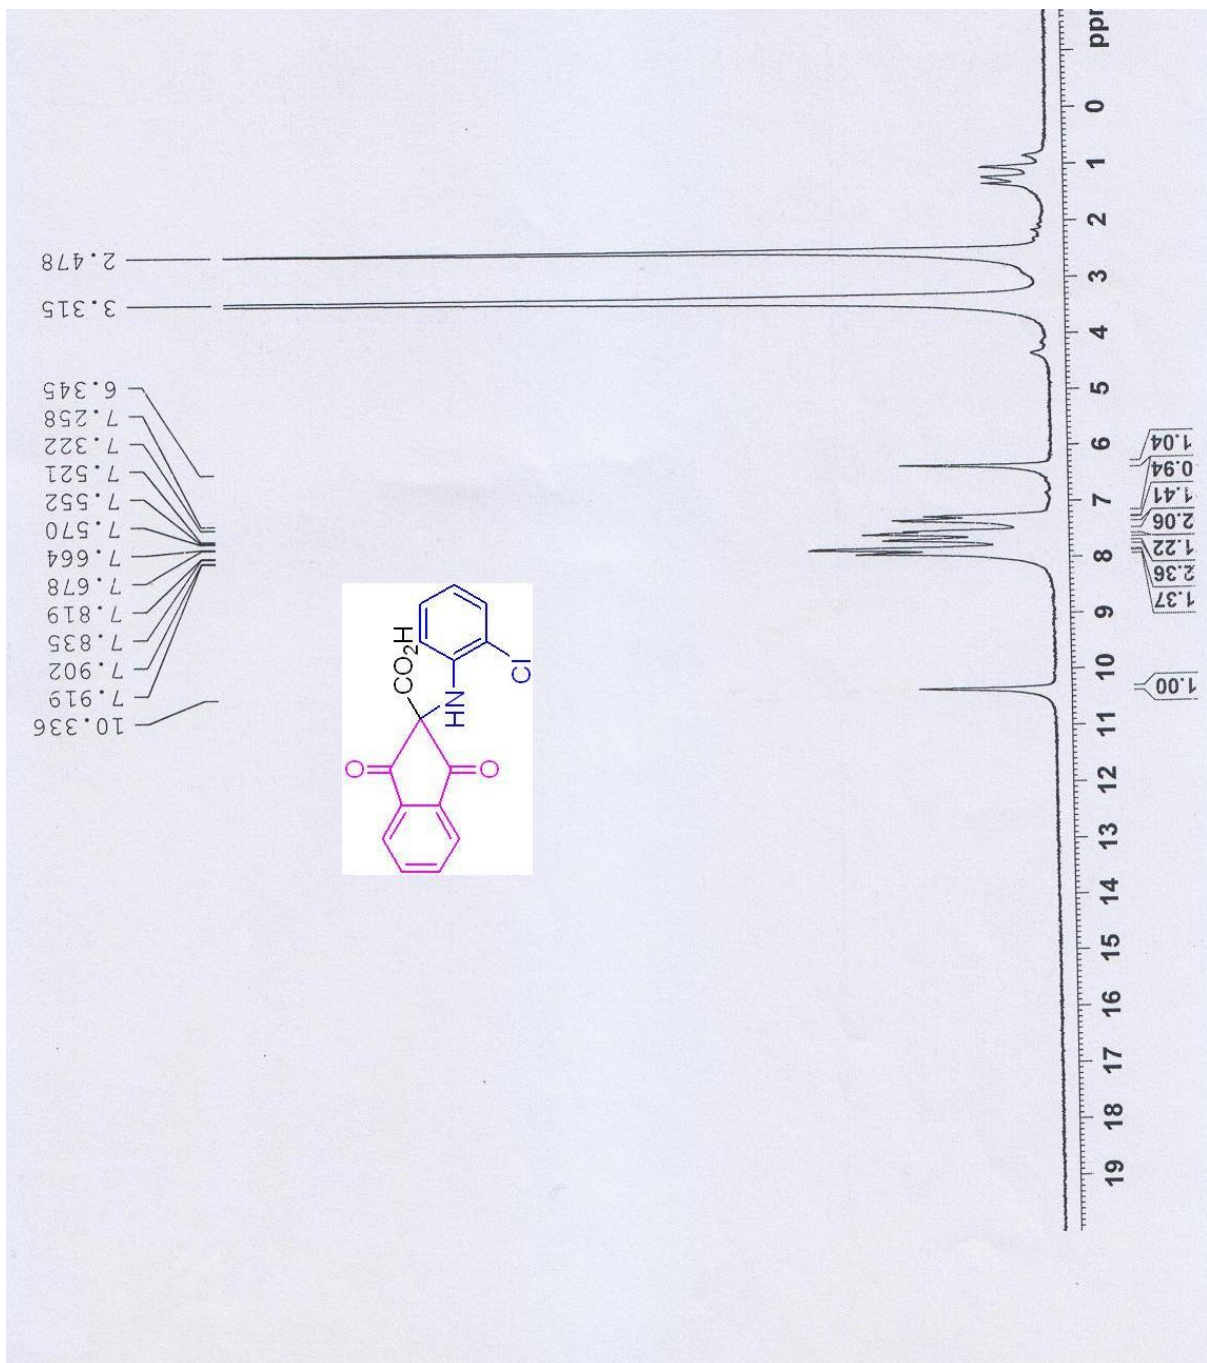

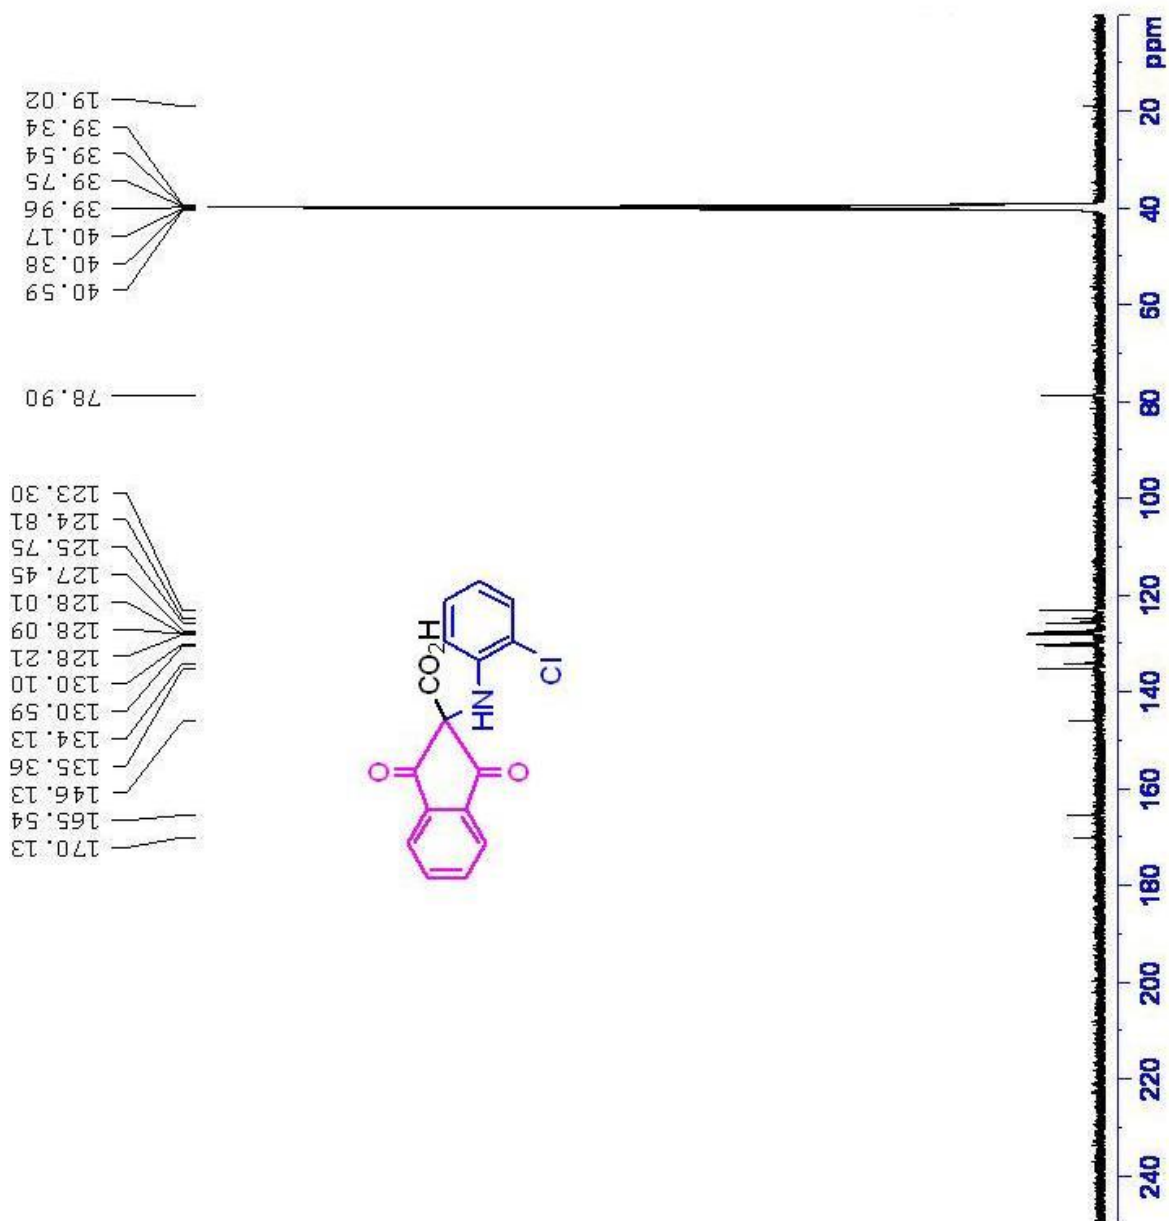

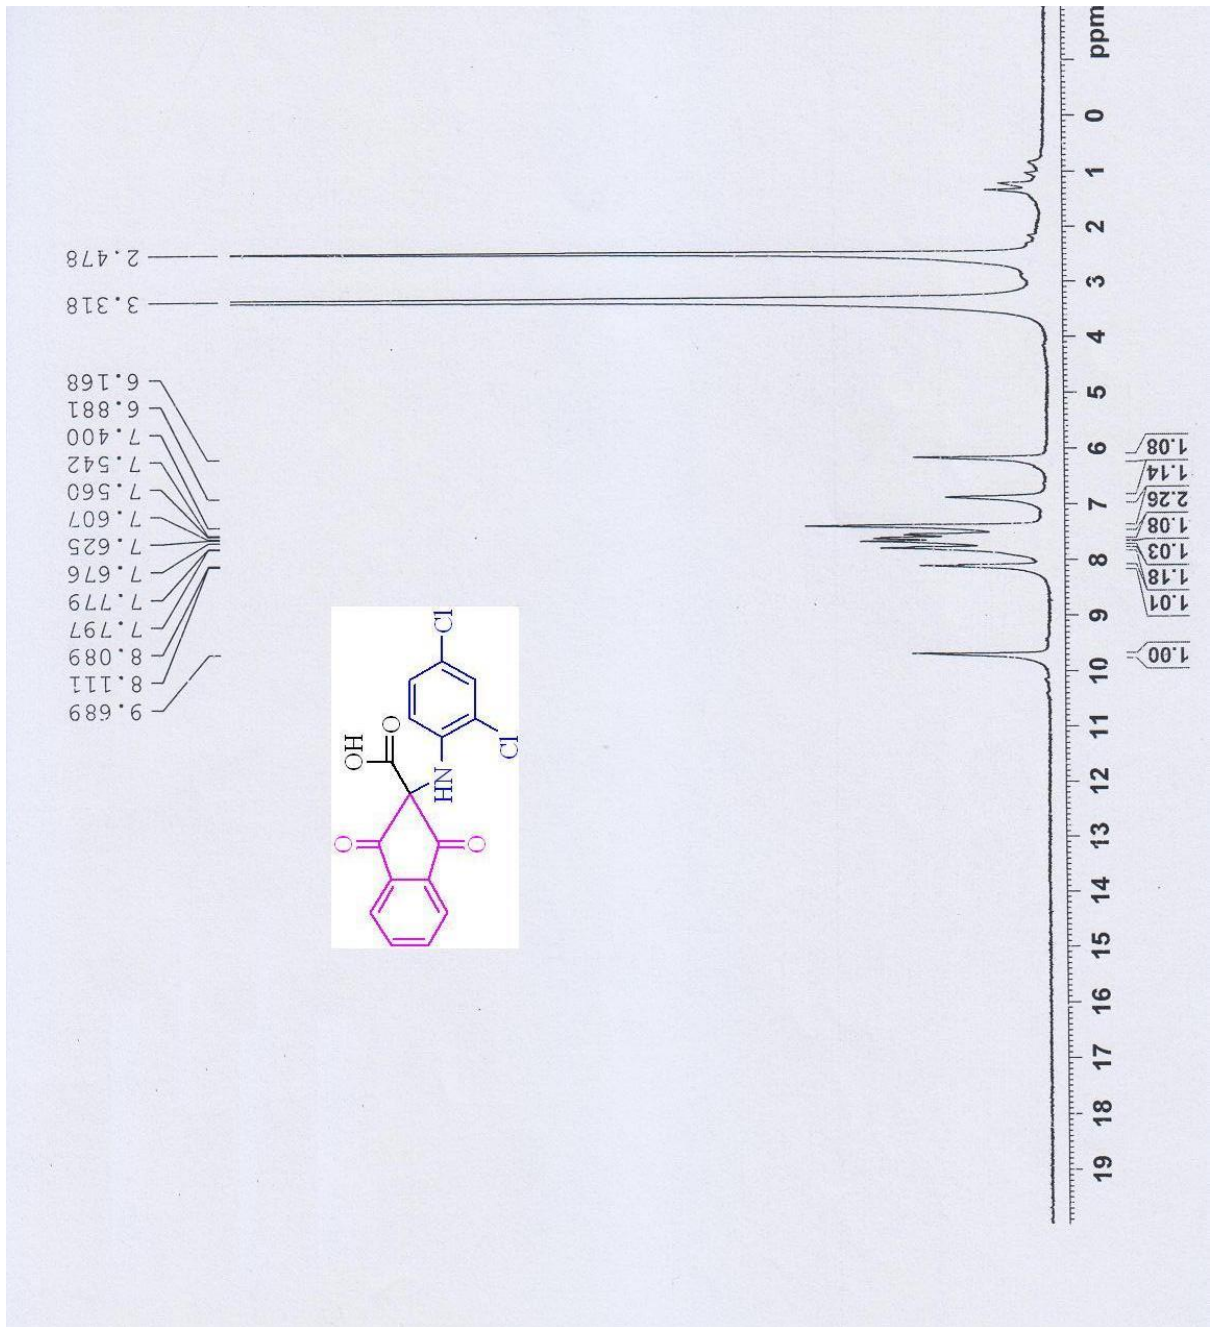

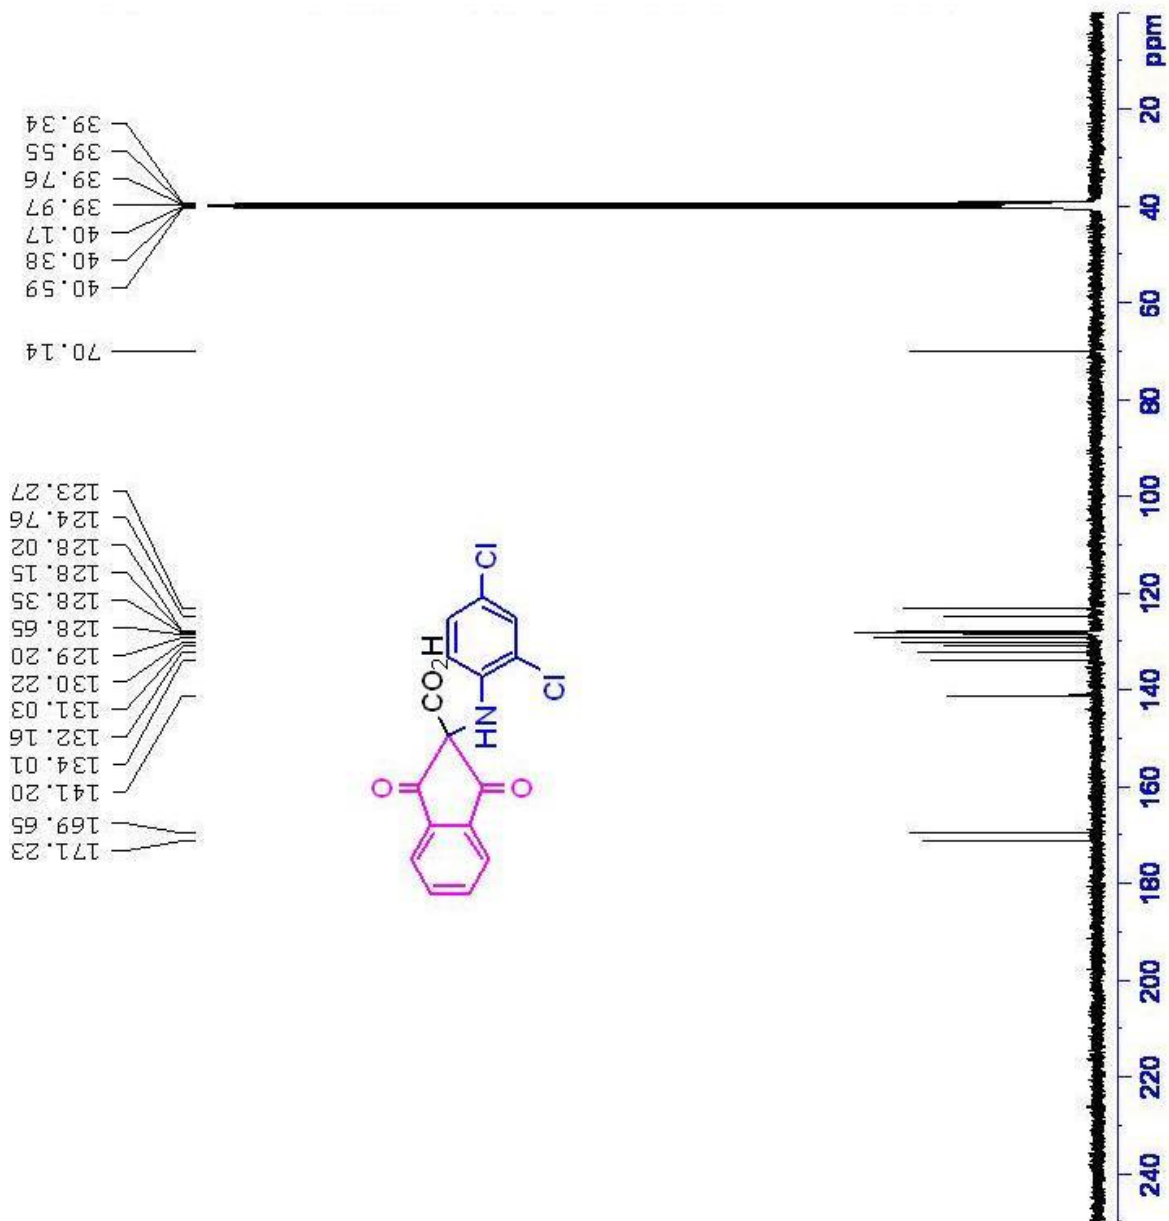

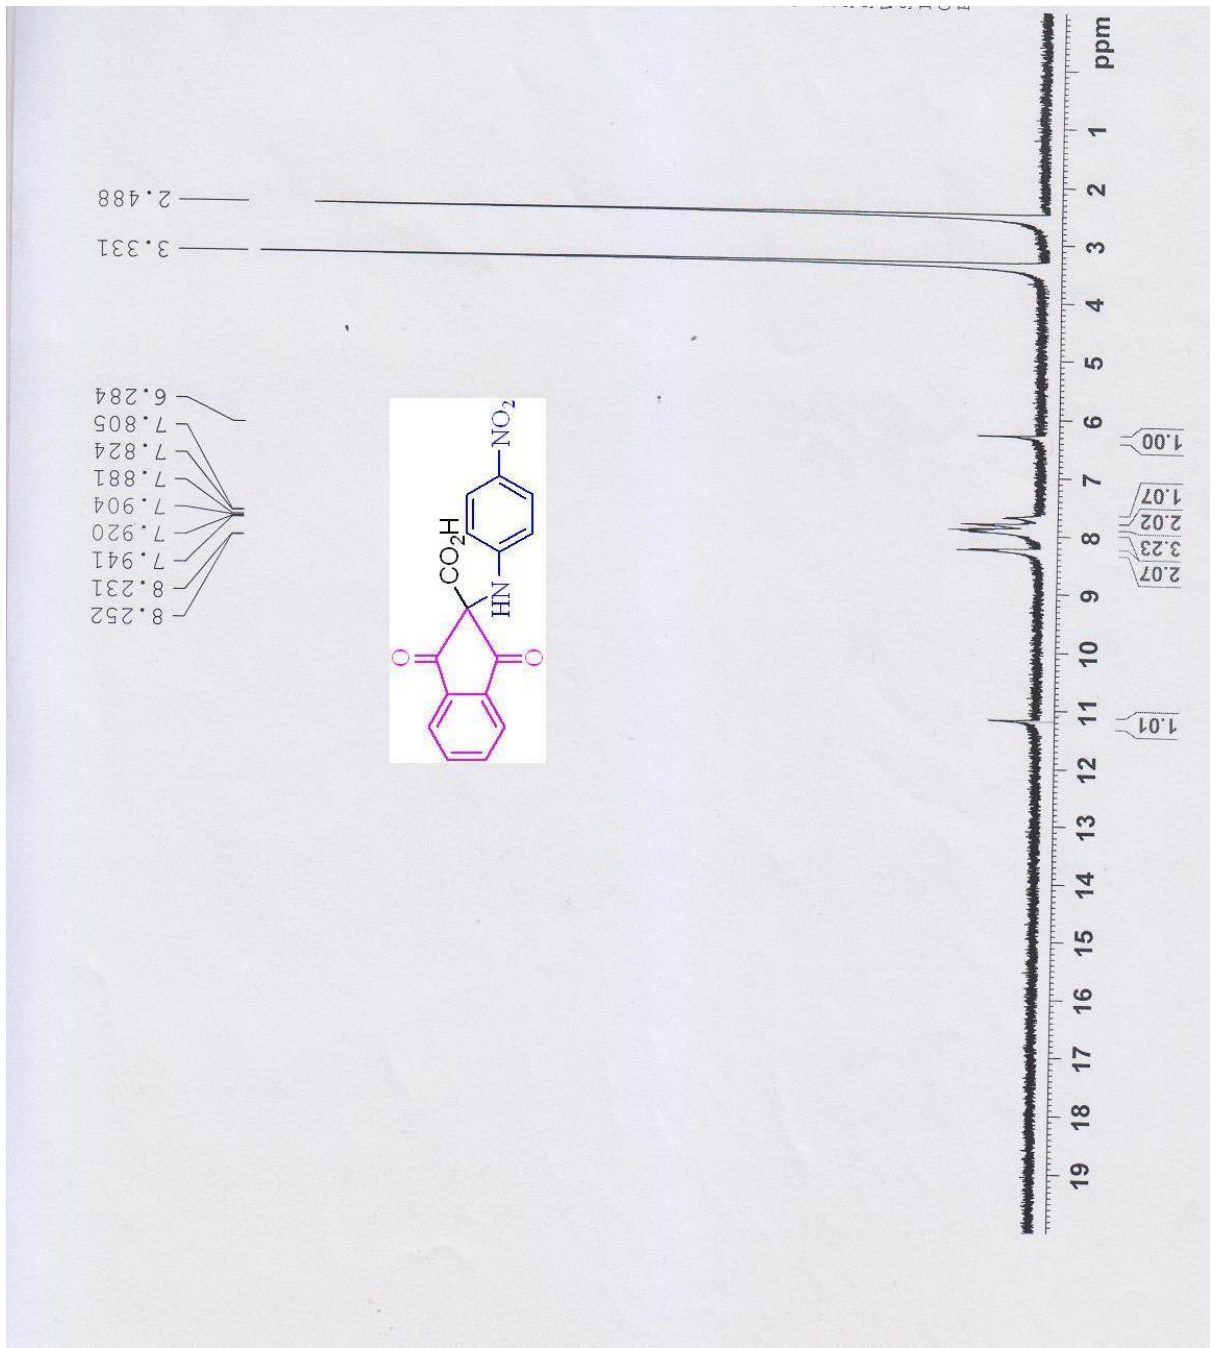

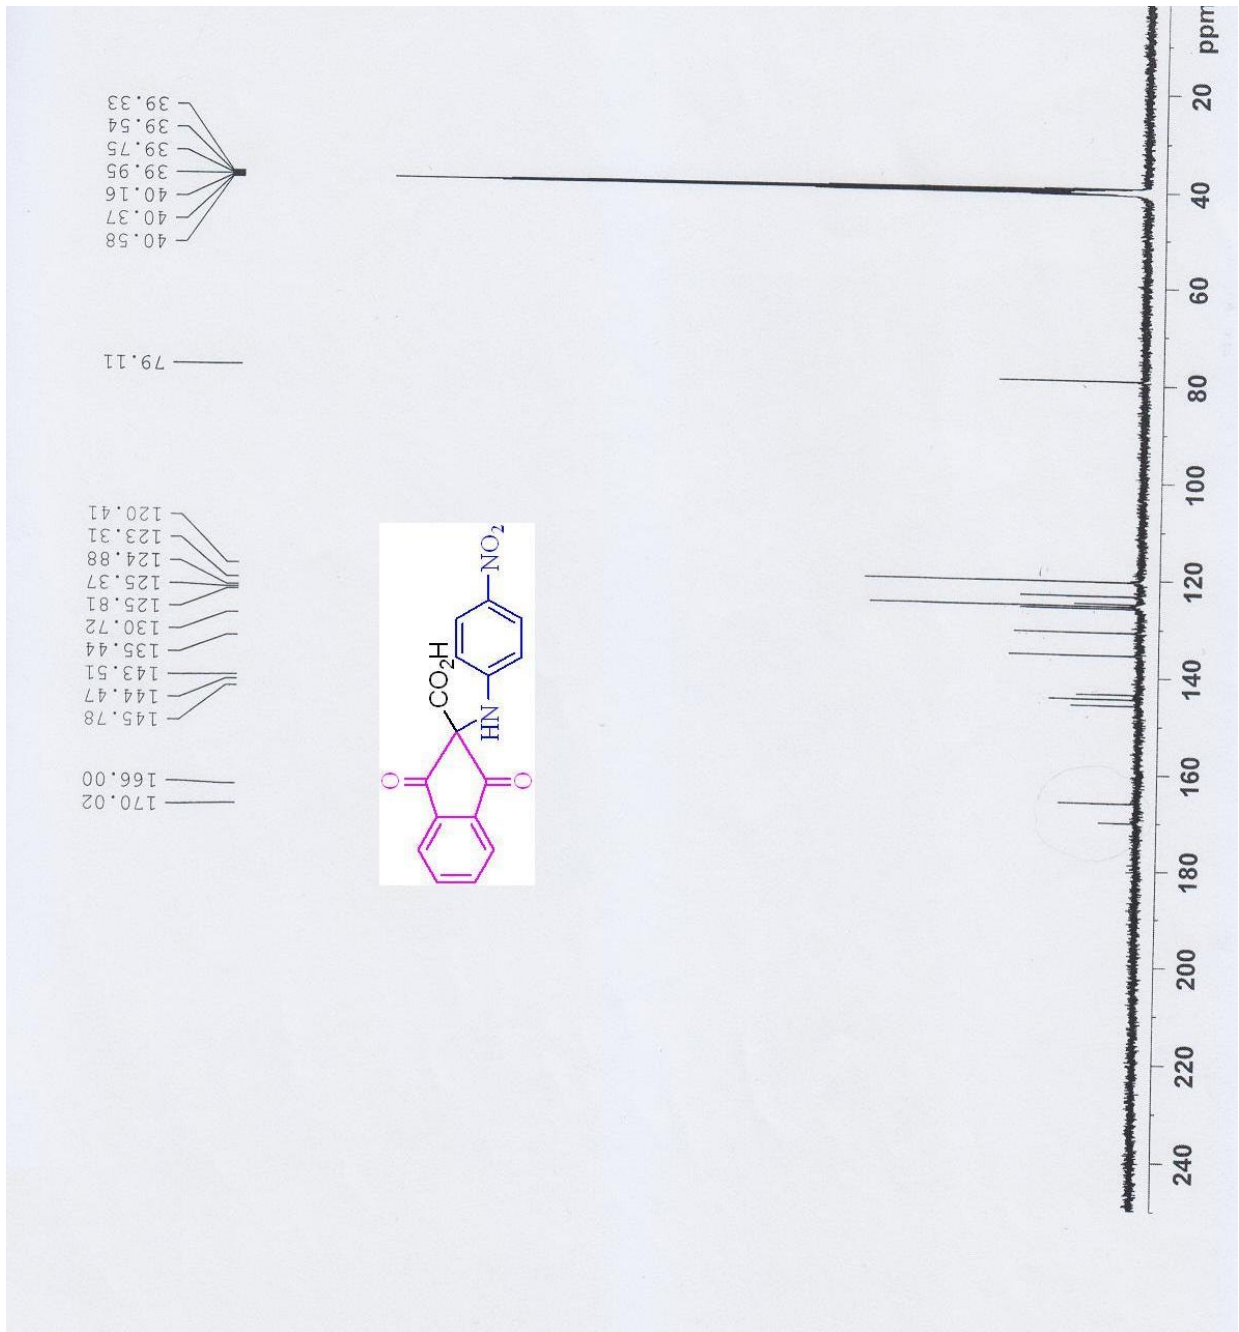

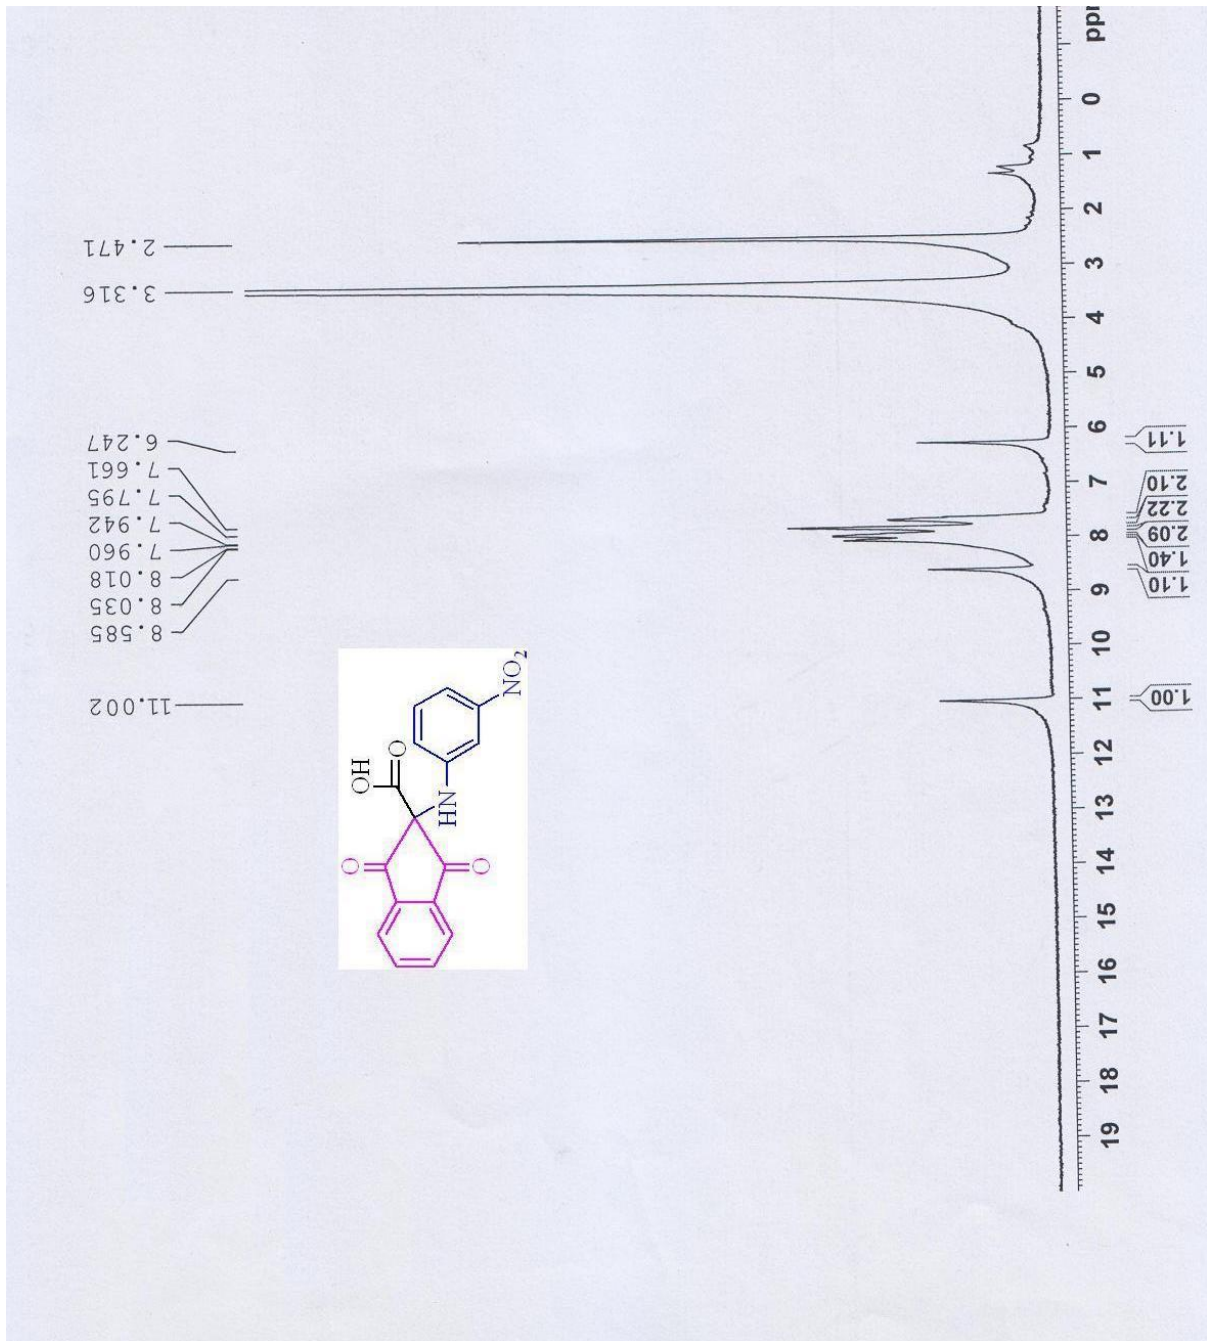

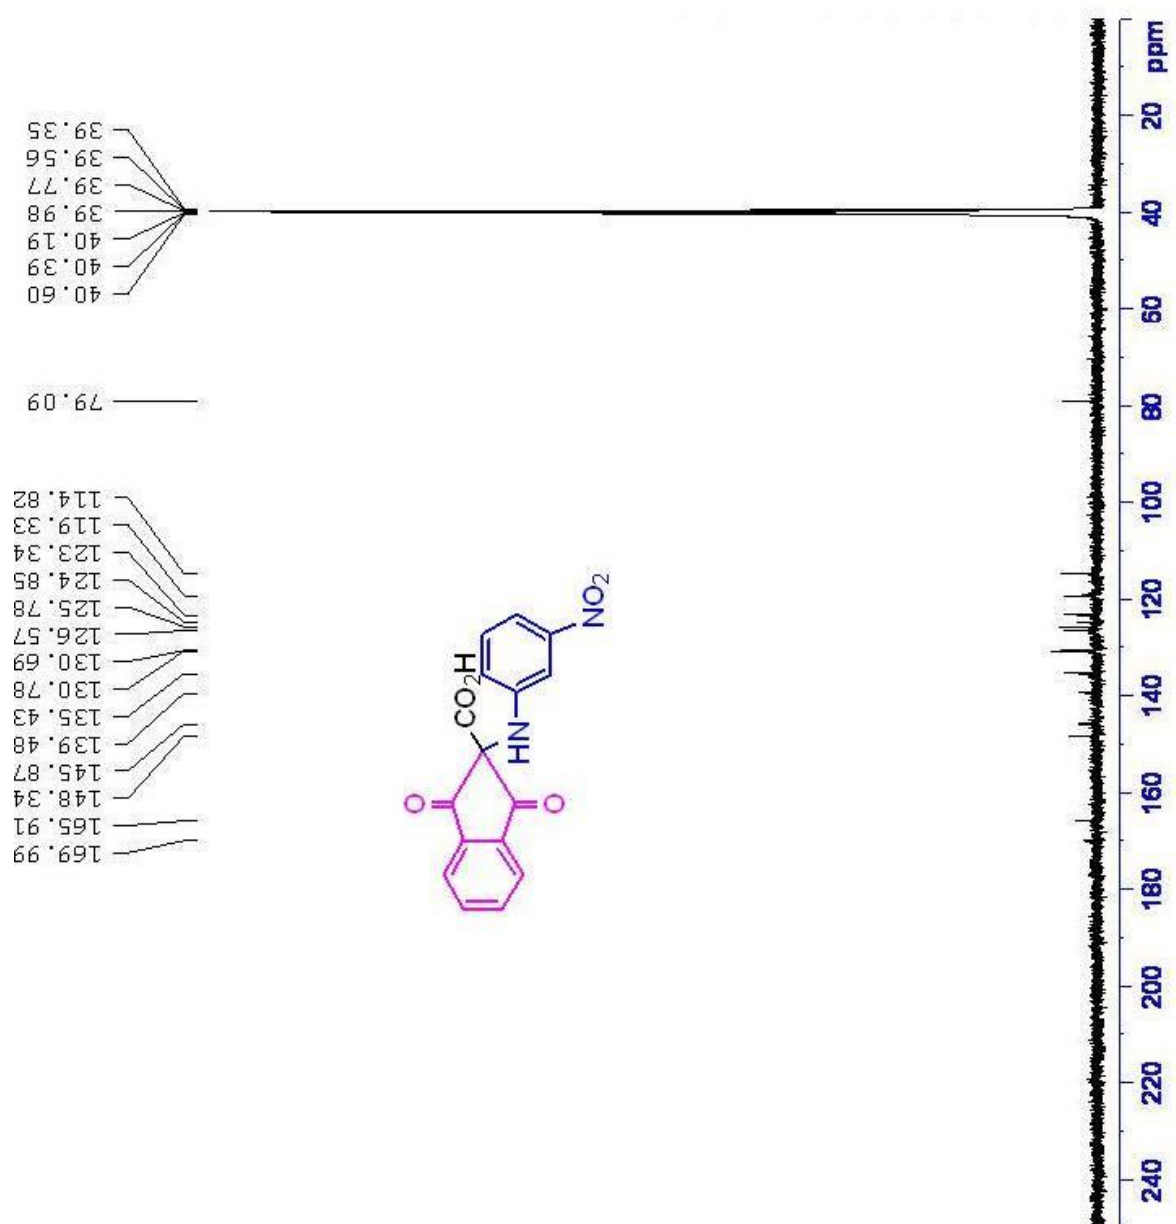



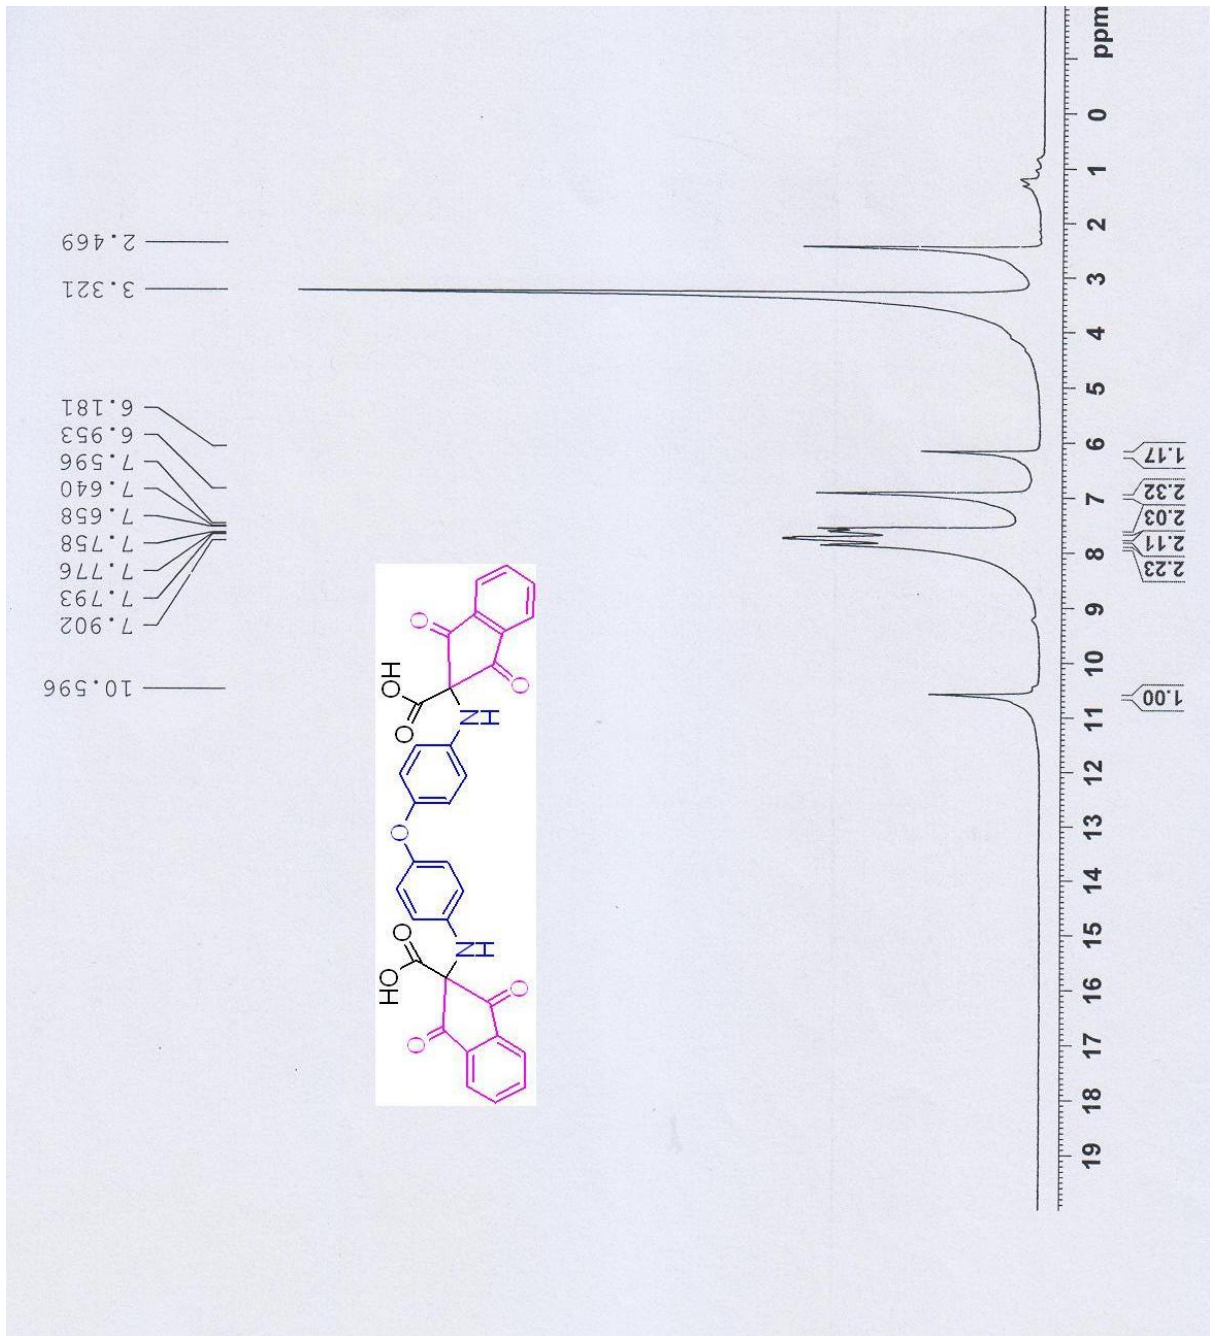

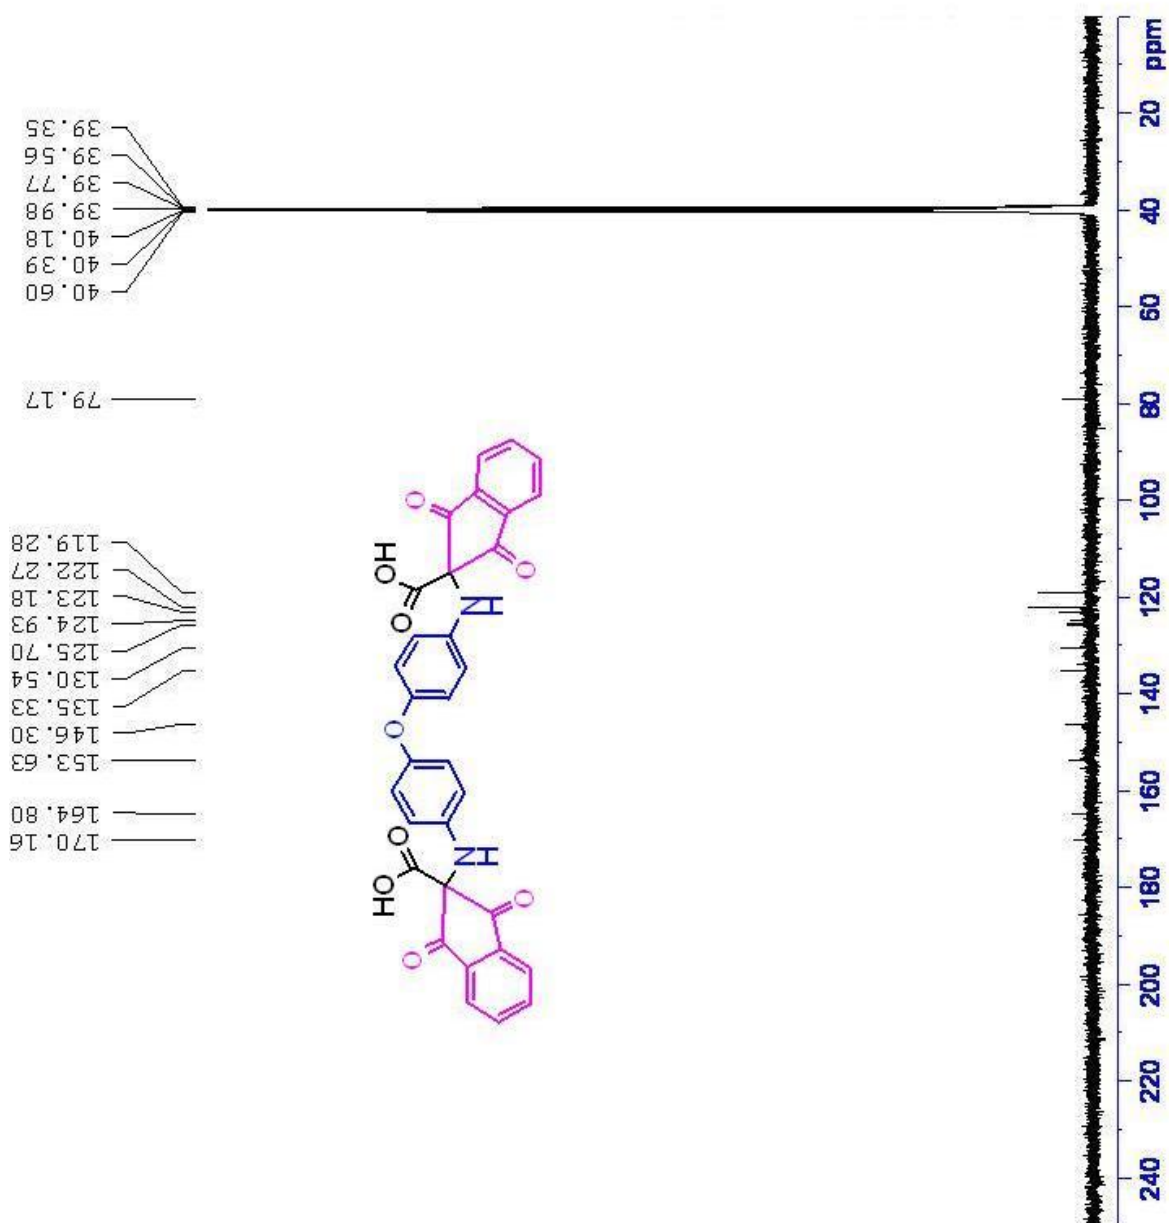

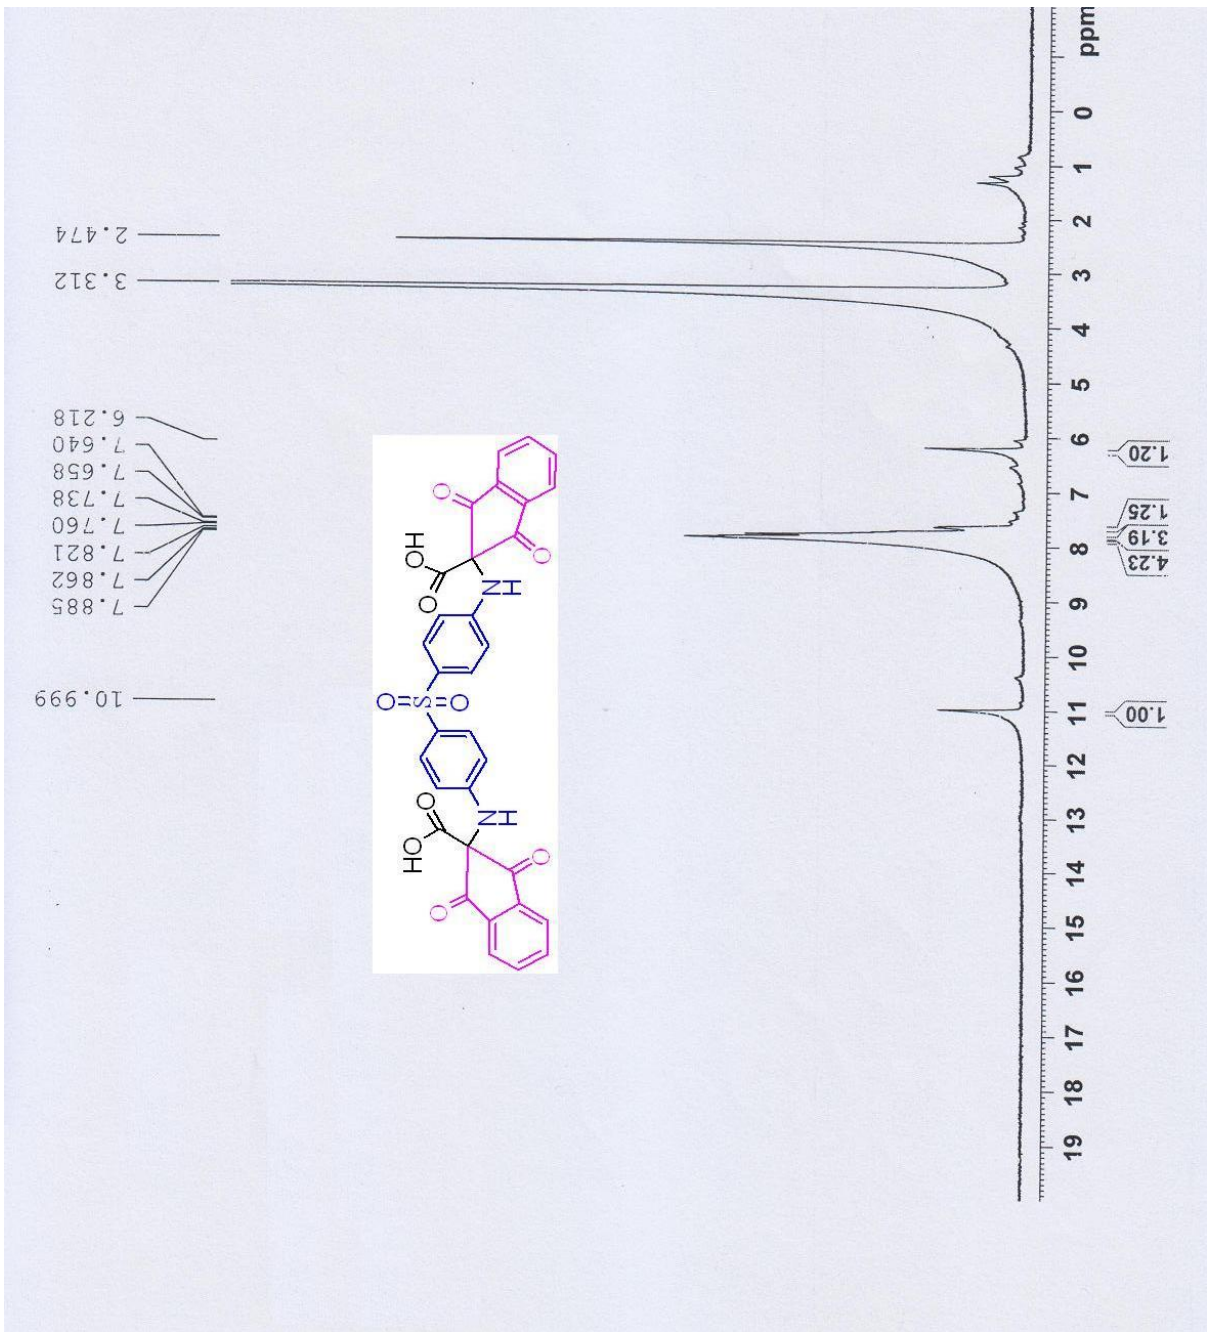

Supplement: c5nj03455h1.pdf [file c5nj03455h1.pdf]
